# Supplementary material for: Exploiting the Stemness and Chemoresistance Transcriptome of Ewing Sarcoma to Identify Candidate Therapeutic Targets and Drug-Repurposing Candidates
Source: MDPI journal article supplement (doi:10.3390/cancers15030769), 2023-01-26

Figure 2A

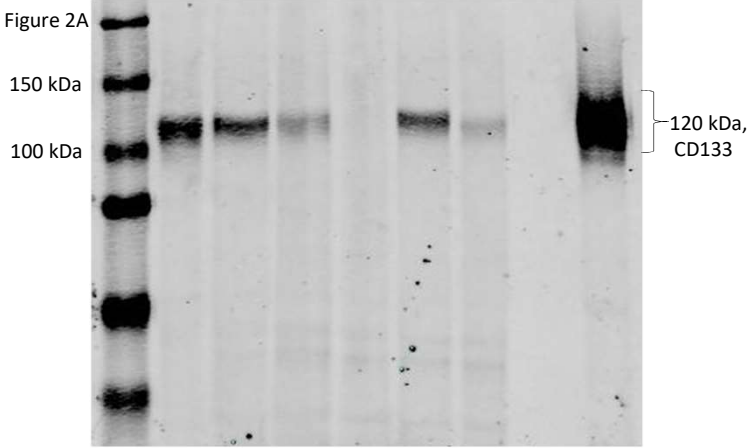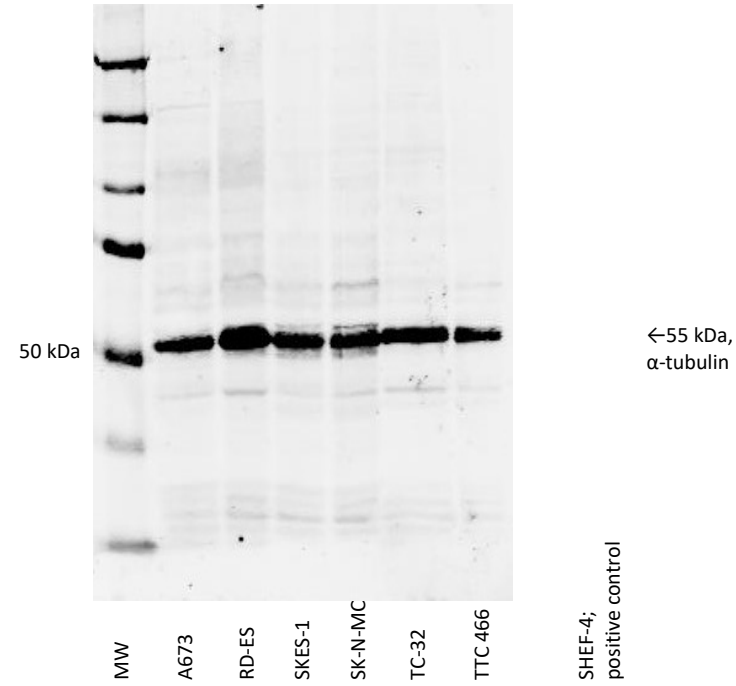

SHEF-4;  
positive control

Supplementary Figure 2-A673

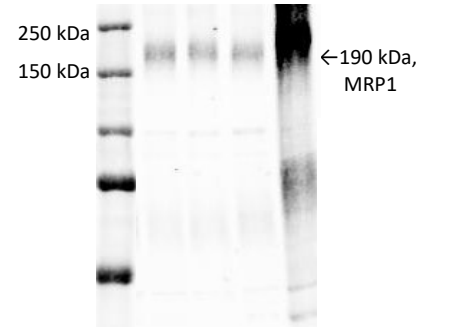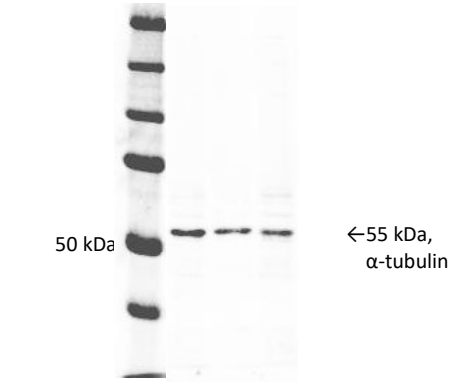

MW  
A673  
CD133 negative  
CD133 positive  
T98G; positive  
control

Supplementary Figure 3- TC32

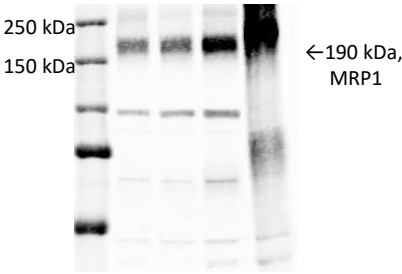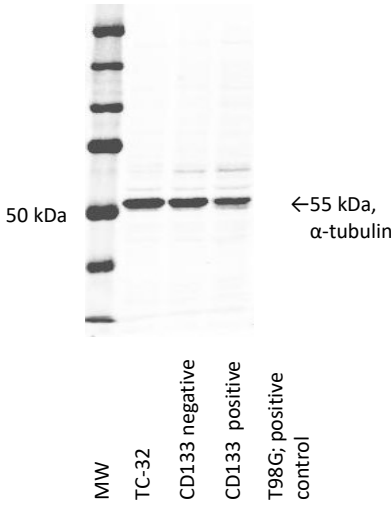

MW  
TC-32  
CD133 negative  
CD133 positive  
T98G; positive  
control

Supp 2G and 3G

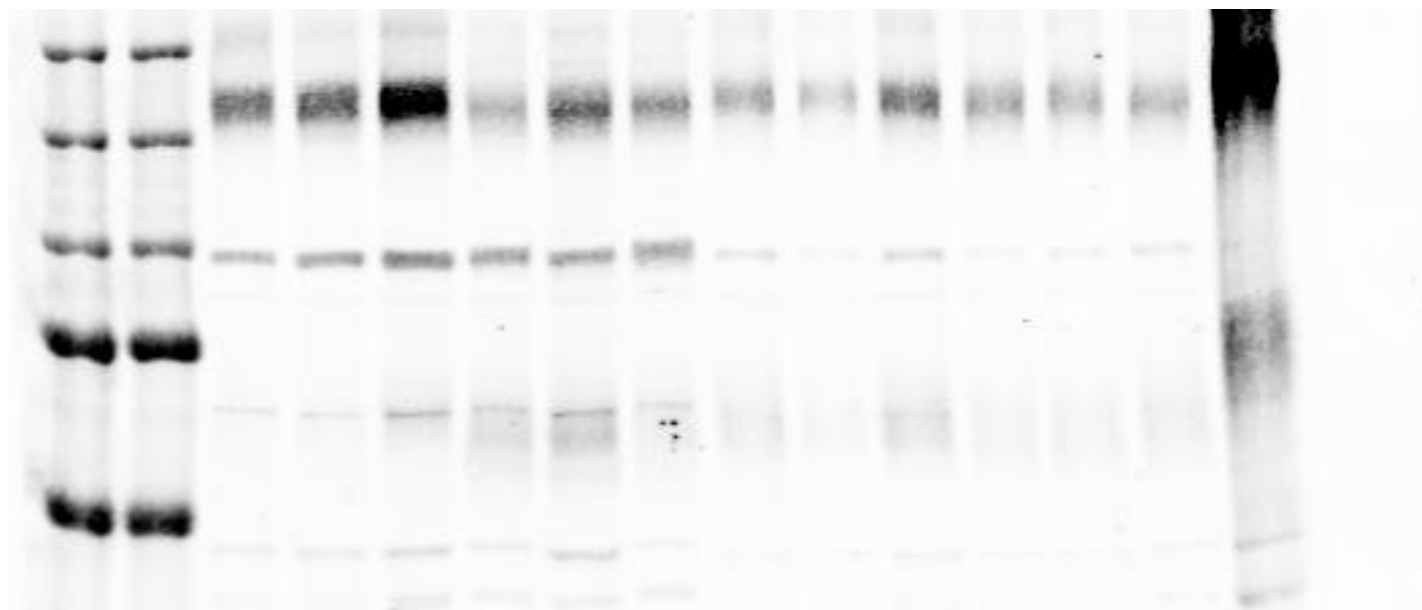

---

Supp Figure 3G  
TC32

---

Supp Figure 2G  
A673

Figure 4I

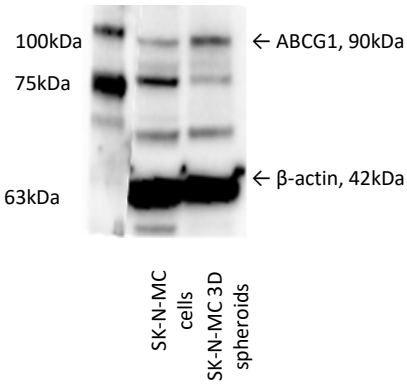

Figure 6D

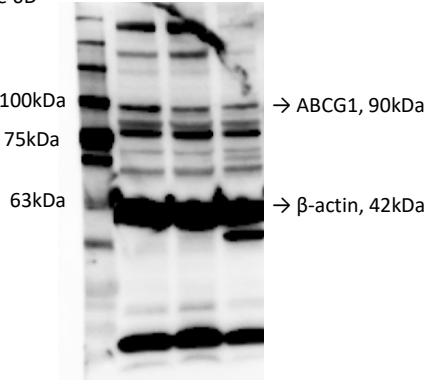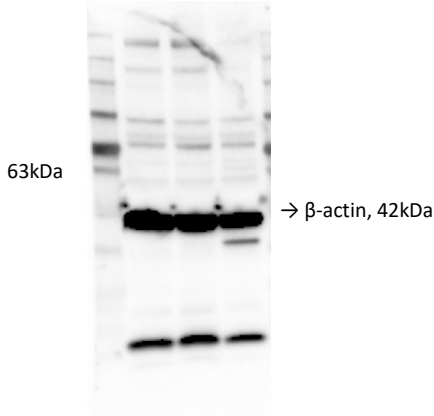

CD133 positive  
CD133 negative  
TC-32

Figure 6E

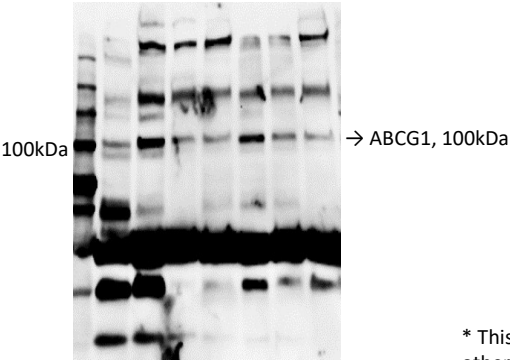

\* This WB was probed for other antibodies for other projects

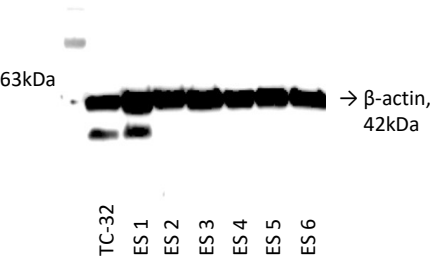

Supplement: s1 [file s1]
