# Supplementary material for: Exploiting the Stemness and Chemoresistance Transcriptome of Ewing Sarcoma to Identify Candidate Therapeutic Targets and Drug-Repurposing Candidates
Source: Cancers (Basel). 2023 Jan 26;15(3):769. doi: 10.3390/cancers15030769 (PMC9913297; doi:10.3390/cancers15030769)
Supplement: Supplementary file 1 [file cancers-15-00769-s001.zip]

Archive with 5 entries (5 files):
- cancers-2050809-WB.pdf
- Supplementary Data 1.pdf
- Supplementary Data 2_3_4_5_6_9.pptx
- Supplementary Data 7_8.xlsx
- Supplementary Methods.pdf
