# Supplementary material for: Exploiting the Stemness and Chemoresistance Transcriptome of Ewing Sarcoma to Identify Candidate Therapeutic Targets and Drug-Repurposing Candidates
Source: Cancers (Basel). 2023 Jan 26;15(3):769. doi: 10.3390/cancers15030769 (PMC9913297; doi:10.3390/cancers15030769)
Supplement: Supplementary file 1 [file cancers-15-00769-s001.zip › Supplementary Data 7_8.xlsx]

## Sheet: Supplementary data7
Drug	Direct Targets	Indirect Targets	Cancer Drug	Off-Patent	Trial Count	Max Trial Phase	Trials	Dir_DGI Support	Ind_DGI Support	Dir Assoc	Ind Assoc	ReDO_DB Support	Ewings sarcoma Targets	Trials By Phase	Trials By Status	Trials By Cancer	Advanced Trials	BNFC
Acenocoumarol	ABCB1	VKORC1	N					0.09		0.115802	0.0384866		ABCB1					N
Agomelatine	ABCB1	MTNR1B, MTNR1A, HTR2C	N	No				0.05		0.115802	0.618276	0.1	ABCB1					N
Aliskiren	ABCB1	REN	N	Yes	1	Phase 2	ACTRN12619001078145[Phase 2:Recruiting:Multiple cancer types]	0.13		0.115802	0.0370092	0.1	ABCB1	Phase 2(1)	Recruiting(1)	Multiple cancer types(1)		N
Amiodarone	ABCB1	PPARGC1B, PPARA, PPARG, THRA, CACNA1C, ADRB1, KCNH2	N	Yes				0.01		0.115802	0.772804	0.7	ABCB1					N
Amisulpride	ABCB1	OPRK1, OPRD1, OPRM1, HTR2A, DRD3, DRD2	N					0.06		0.115802	2.12473		ABCB1, OPRK1					Y
Amitriptyline	ABCB1	KCNH2, CHRM1, KCNQ3, HTR6, HTR1B, OPRM1, HTR1D, ADRA1B, HTR2C, SIGMAR1, HRH4, HRH2, KCNA1, KCNQ2, HRH1, ADRA2A, ADRA1D, ADRA1A, NTRK2, NTRK1, OPRK1, OPRD1, HTR1A, HTR2A, SLC6A4, SLC6A2	N	Yes				0.1		0.115802	5.88974	0.2	ABCB1, NTRK2, NTRK1, OPRK1					N
Amprenavir	ABCB1		N					0.06		0.115802			ABCB1					N
Anastrozole	ABCB1	CYP19A1	Y	Yes				0.02		0.115802	0.0955413		ABCB1					N
Aripiprazole	ABCB1	SLC6A4, SLC6A3, GRIN1, OPRD1, OPRM1, OPRK1, CHRM3, CHRM2, CHRM1, HRH4, HRH3, HRH2, ADRB2, ADRB1, HTR5A, HTR2B, DRD5, HTR1E, ADRA2B, DRD4, DRD1, HTR6, HTR3A, HTR2C, HTR1B, HRH1, ADRA2C, ADRA2A, HTR1D, DRD3, ADRA1B, ADRA1A, HTR2A, DRD2, HTR1A	N	Yes				0.04		0.115802	7.47	0.2	ABCB1, SLC6A3, OPRK1					Y
Astemizole	ABCB1	MAPT, KCNH1, KCNH2, HRH1	N					0.02		0.115802	0.555822		ABCB1, MAPT					N
Atazanavir	ABCB1		N					0.06		0.115802			ABCB1					Y
Atenolol	ABCB1	ADRB2, ADRB1	N	Yes				0.01		0.115802	0.798819	0.1	ABCB1					Y
Atorvastatin	ABCB1	NR1I3, HDAC2, AHR, DPP4, HMGCR	N	Yes	16	Phase 3	NCT03560882[Phase 1:Recruiting:Multiple cancer types, Leukemia];NCT03024684[Phase 3:Recruiting:GI];NCT03872388[Phase 2:Recruiting:Breast];NCT05103644[Phase 2/3:Recruiting:Breast];NCT04862260[Phase 1:Recruiting:GI];CTRI/2018/07/014865[Phase 1:Not Yet Recruiting:GI];2014-005508-62[Phase 2:Ongoing:Breast];NCT03819101[Phase 3:Recruiting:Urological];NCT03971019[Phase 3:Recruiting:Breast];NCT02958852[P…	0.04		0.115802	0.528181	0.9	ABCB1, NR1I3, HDAC2, AHR, DPP4, HMGCR	Phase 1(4), Phase 2(6), Phase 2/3(1), Phase 3(5)	Recruiting(13), Ongoing(1), Not yet recruiting(2)	Multiple cancer types, Leukemia(1), GI(4), Breast(8), Urological(3)	NCT03024684[Phase 3; Recruiting], NCT03819101[Phase 3; Recruiting], NCT03971019[Phase 3; Recruiting], NCT04601116[Phase 3; Recruiting], NCT04026230[Phase 3; Recruiting]	Y
Bepridil	ABCB1	KCNH2, PDE1A, PDE1B, CALM1, TNNC1, KCNQ1, CACNA2D2, CACNA1H, CACNA1A	N	Yes				0.03		0.115802	0.298429	0.2	ABCB1					N
Bleomycin	ABCB1	LIG3, LIG1	Y	Yes				0.03		0.115802	0.0292836		ABCB1, LIG1					Y
Boceprevir	ABCB1		N					0.07		0.115802			ABCB1					N
Bromocriptine	ABCB1	ADRA1D, ADRA1B, ADRA1A, DRD1, DRD5, HTR2C, HTR1B, HTR2A, DRD4, HTR2B, ADRA2B, ADRA2C, HTR1A, ADRA2A, HTR1D, DRD3, DRD2	N	Yes				0.05		0.115802	3.21992	0.7	ABCB1					N
Bromperidol	ABCB1		N					0.06		0.115802			ABCB1					N
Capecitabine	ABCB1	TYMS	Y	Yes				0.02		0.115802	0.408723		ABCB1					N
Carboplatin	ABCB1		Y	Yes				0.01		0.115802			ABCB1					Y
Carvedilol	ABCB1	KCNJ2, KCNJ4, HIF1A, SELE, ADRA2A, ADRA2B, ADRA2C, ADRA1B, ADRA1D, VCAM1, KCNH2, GJA1, NPPB, VEGFA, ADRB2, NDUFC2, ADRA1A, ADRB1	N	Yes	2	Phase 2	NCT02944201[Phase 2:Active, not recruiting:Urological];NCT03980249[Phase 1:Not yet recruiting:CNS]	0.01		0.115802	4.16453	0.9	ABCB1, HIF1A, GJA1, VEGFA	Phase 1(1), Phase 2(1)	Active, not recruiting(1), Not yet recruiting(1)	Urological(1), CNS(1)		Y
Celiprolol	ABCB1	ADRA2C, ADRA2B, ADRA2A, ADRB3, ADRB2, ADRB1	N					0.13		0.115802	2.69459		ABCB1, ADRB3					N
Ceritinib	ABCB1	ALK	Y	No				0.05		0.115802	0.705341		ABCB1, ALK					N
Chlorpromazine	ABCB1	HRH4, HTR6, ORM1, CALM1, SMPD1, CHRM3, CHRM1, ADRA2A, HTR2C, DRD5, DRD4, DRD3, KCNH2, HRH1, ADRA1B, ADRA1A, HTR2A, HTR1A, DRD1, DRD2	N	Yes	3	Phase 2	NCT05433402[Phase 1/2:Not yet recruiting:GI];NCT05190315[Phase 1:Recruiting:CNS];NCT04224441[Phase 2:Recruiting:CNS]	0.04		0.115802	2.43719	0.7	ABCB1	Phase 1(1), Phase 1/2(1), Phase 2(1)	Recruiting(2), Not yet recruiting(1)	GI(1), CNS(2)		N
Cimetidine	ABCB1	HRH2	N	Yes				0.03		0.115802	0.385607	0.8	ABCB1					N
Citalopram	ABCB1	HRH1, SLC6A4	N	Yes	1	Phase 3	2013-004705-59[Phase 3:Ongoing:CNS]	0.05		0.115802	0.6012	0.7	ABCB1	Phase 3(1)	Ongoing(1)	CNS(1)	2013-004705-59[Phase 3; Ongoing]	Y
Clarithromycin	ABCB1	SLCO1B3, SLCO1B1, KCNH2	N	Yes	18	Phase 4	NCT03031483[Phase 2:Active, not recruiting:Lymphoma];NCT02343042[Phase 1/2:Recruiting:Other Haem-onc];NCT04302324[Phase 2:Recruiting:Other Haem-onc];JPRN-UMIN000024166[Phase 2::Other Haem-onc];NCT01559935[Phase 2:Active, not recruiting:Other Haem-onc];NCT02542657[Phase 1/2:Active, not recruiting:Other Haem-onc];NCT02366884[Phase 2:Recruiting:Multiple cancer types];ChiCTR2100047608[Phase 4:Recruit…	0.06		0.115802	0.178554	0.8	ABCB1	Phase 1/2(2), Phase 2(10), Phase 3(3), Phase 4(1), Other(2)	Recruiting(8), Active, not recruiting(8), Not yet recruiting(1), Other(1)	Lymphoma(1), Other Haem-onc(15), Multiple cancer types(1), GI(1)	ChiCTR2100047608[Phase 4; Recruiting], NCT02575144[Phase 3; Active, not recruiting], NCT02516696[Phase 3; Active, not recruiting], NCT04287660[Phase 3; Recruiting]	Y
Clomipramine	ABCB1	GSTP1, SLC6A2, HTR2C, HTR2B, HTR2A, SLC6A4	N	Yes				0.04		0.115802	0.665459	0.2	ABCB1					N
Clopidogrel	ABCB1	P2RY12	N	Yes	1	Phase 1	NCT03245489[Phase 1:Recruiting:Head and Neck]	0.46		0.115802	0.0262999	0.7	ABCB1	Phase 1(1)	Recruiting(1)	Head and Neck(1)		N
Clozapine	ABCB1	GSTP1, CHRM3, CHRM2, CHRM1, ADRA2C, ADRA2B, ADRA2A, ADRA1B, ADRA1A, HRH4, HRH1, HTR6, HTR2C, HTR3A, HTR1E, HTR1D, HTR1B, HTR1A, DRD4, DRD3, DRD1, HTR2A, DRD2	N					0.02		0.115802	3.96108		ABCB1					Y
Codeine	ABCB1	OPRD1, OPRK1, OPRM1	N					0.13		0.115802	1.64023		ABCB1, OPRK1					N
Colchicine	ABCB1	TUBB	N	Yes	2	Phase 2	NCT05279690[Phase 1:Recruiting:Urological, Multiple cancer types];NCT04264260[Phase 2:Recruiting:GI]	0.02		0.115802	0.554322	0.7	ABCB1, TUBB	Phase 1(1), Phase 2(1)	Recruiting(2)	Urological, Multiple cancer types(1), GI(1)		N
Crizotinib	ABCB1	MET, ALK	Y	Unclear				0.03		0.115802	1.15821		ABCB1, MET, ALK					N
Cyanocobalamin	ABCB1	MTHFR, MMACHC, MTRR, MTR	N					0.09		0.115802	0.129715		ABCB1					Y
Dabigatran	ABCB1		N					0.09		0.115802			ABCB1					N
Daptomycin	ABCB1		N					0.52		0.115802			ABCB1					Y
Deferoxamine	ABCB1	APP	N	Yes	4	Phase 3	NCT05184816[Phase 1:Recruiting:Multiple cancer types];NCT05300958[Phase 2:Recruiting:Breast];IRCT20200313046756N2[Phase 3:Pending:Leukemia];NCT03652467[Phase 1:Recruiting:GI]	0.04		0.115802	0.0485087	0.7	ABCB1	Phase 1(2), Phase 2(1), Phase 3(1)	Recruiting(3), Not yet recruiting(1)	Multiple cancer types(1), Breast(1), Leukemia(1), GI(1)	IRCT20200313046756N2[Phase 3; Pending]	N
Desipramine	ABCB1	ADRA2A, DRD2, HTR2C, HTR1A, CHRM3, CHRM2, CHRM1, ADRA1A, HRH1, SMPD1, ADRB1, HTR2A, SLC6A4, ADRB2, SLC6A2	N					0.02		0.115802	3.18533		ABCB1					N
Dexamethasone	ABCB1	NR1I2, NOS2, ANXA1, NR0B1, NR3C1	Y	Yes				0.01		0.115802	0.870807		ABCB1, NR1I2, NR0B1, NR3C1					Y
Dexrazoxane	ABCB1	TOP2B, TOP2A	Y	Yes				0.21		0.115802	0.624034		ABCB1, TOP2B, TOP2A					N
Dextromethorphan	ABCB1	SLC6A2, CYBB, OPRK1, OPRD1, OPRM1, CHRNA7, CHRNB2, CHRNB4, CHRNA4, CHRNA3, PGRMC1, SLC6A4, GRIN3A, CHRNA2, SIGMAR1	N					0.09		0.115802	3.35647		ABCB1, OPRK1					N
Dicloxacillin	ABCB1		N					0.19		0.115802			ABCB1					N
Digoxin	ABCB1		N	Yes	2	Phase 2	NCT04141995[Phase 2:Recruiting:GI];NCT03889795[Phase 1:Recruiting:Multiple cancer types]	0.02		0.115802		0.7	ABCB1	Phase 1(1), Phase 2(1)	Recruiting(2)	GI(1), Multiple cancer types(1)		Y
Diltiazem	ABCB1	CACNA1C	N					0.03		0.115802	0.0398448		ABCB1					N
Disulfiram	ABCB1	DBH, ALDH2	N	Yes	13	Phase 2/3	NCT02671890[Phase 1:Recruiting:Multiple cancer types, GI];NCT05210374[Phase 1:Not yet recruiting:Soft Tissue Sarcoma, Bone Sarcoma];NCT02715609[Phase 1/2:Recruiting:CNS];NCT04521335[Phase 1:Recruiting:Other Haem-onc];NCT03363659[Phase 2:Active, not recruiting:CNS];2019-000558-68[Phase 2:Ongoing:Urological];2019-001972-12[Phase 1/2:Ongoing:Multiple cancer types, Breast];2019-002748-25[Phase 2:Ongo…	0.01		0.115802	0.117577	0.8	ABCB1	Phase 1(4), Phase 1/2(2), Phase 2(6), Phase 2/3(1)	Recruiting(7), Active, not recruiting(2), Ongoing(3), Not yet recruiting(1)	Multiple cancer types, GI(1), Soft Tissue Sarcoma, Bone Sarcoma(1), CNS(3), Other Haem-onc(1), Urological(2), Multiple cancer types, Breast(1), GI(2), Breast(2)		N
Domperidone	ABCB1	DRD3, DRD2	N					0.15		0.115802	0.480728		ABCB1					Y
Doxycycline	ABCB1		N	Yes	10	Phase 2	RPCEC00000367[Phase 2:Recruiting:Urological];NCT01820910[Phase 2:Active, not recruiting:Lymphoma];NCT02366884[Phase 2:Recruiting:Multiple cancer types];NCT02874430[Phase 2:Active, not recruiting:Breast, Gynaecological];2016-000871-26[Phase 2:Ongoing:Breast];NCT02775695[Phase 2:Active, not recruiting:GI];ACTRN12620000815965[Phase 2:Not yet recruiting:GI];NCT03076281[Phase 2:Active, not recruiting:…	0.06		0.115802		0.8	ABCB1	Phase 1(1), Phase 2(9)	Recruiting(4), Active, not recruiting(4), Ongoing(1), Not yet recruiting(1)	Urological(1), Lymphoma(3), Multiple cancer types(1), Breast, Gynaecological(1), Breast(1), GI(2), Head and Neck(1)		Y
Dronabinol	ABCB1	CNR2, CNR1	N					0.06		0.115802	0.524078		ABCB1					N
Epirubicin	ABCB1	TOP2A	Y	Yes				0.02		0.115802	0.326273		ABCB1, TOP2A					N
Erlotinib	ABCB1	NR1I2, EGFR	Y	Yes				0.01		0.115802	0.851502		ABCB1, NR1I2, EGFR					N
Etravirine	ABCB1		N					0.13		0.115802			ABCB1					Y
Everolimus	ABCB1	MTOR	Y	Yes				0.01		0.115802	0.272489		ABCB1, MTOR					Y
Felodipine	ABCB1	TNNC1, TNNC2, NR3C2, PDE1A, PDE1B, CALM1, CACNA2D2, CACNA1H, CACNA1S, CACNA1D, CACNB2, CACNA2D1, CACNA1C	N	Yes				0.02		0.115802	0.508692	0.2	ABCB1					N
Fenofibrate	ABCB1	NR1I2, MMP25, PPARA	N	Yes	1	Phase 2	NCT01356290[Phase 2:Recruiting:CNS]	0.02		0.115802	0.204433	0.8	ABCB1, NR1I2	Phase 2(1)	Recruiting(1)	CNS(1)		Y
Fentanyl	ABCB1	OPRK1, OPRD1, OPRM1	N					0.08		0.115802	1.64023		ABCB1, OPRK1					Y
Fexofenadine	ABCB1	HRH1	N	Yes				0.17		0.115802	0.334461	0.2	ABCB1					N
Filgrastim	ABCB1	ELANE, CSF3R	N					0.05		0.115802	0.584832		ABCB1, CSF3R					Y
Fluoxetine	ABCB1	KCNH2, CKS1B, CHRNB4, CHRNA3, CHRNA2, HTR2C, SLC6A4	N	Yes				0.04		0.115802	0.501031	0.2	ABCB1					Y
Fluphenazine	ABCB1	HTR2C, HTR2A, AR, CALM1, DRD1, DRD2	N	Yes				0.03		0.115802	0.89653	0.7	ABCB1, AR					N
Fluvastatin	ABCB1	HDAC2, HMGCR	N	Yes				0.02		0.115802	0.255451	1	ABCB1, HDAC2, HMGCR					Y
Fluvoxamine	ABCB1	KCNH2, SLC6A4	N	Yes				0.09		0.115802	0.337055	0.3	ABCB1					N
Gabapentin	ABCB1	KCNQ5, KCNQ3, ADORA1, CACNA1B, CACNA2D2, CACNA2D1	N					0.02		0.115802	0.372066		ABCB1					Y
Gefitinib	ABCB1	EGFR	Y	Yes				0.02		0.115802	0.750974		ABCB1, EGFR					N
Gemtuzumab Ozogamicin	ABCB1	FCGR1A, FCGR3A, FCGR3B, CD33	Y	Unclear				0.26		0.115802	0.173654		ABCB1					Y
Granisetron	ABCB1	HTR3A	N					0.06		0.115802	0.596485		ABCB1					Y
Haloperidol	ABCB1	HTR6, HTR1A, ADRA2C, ADRA2B, ADRA2A, ADRA1A, CHRM3, HRH1, SIGMAR1, HTR2C, SLC18A2, MCHR1, DRD3, HTR2A, GRIN2B, DRD1, DRD2	N	Yes						0.115802	3.18237	0.2	ABCB1					Y
Hydrocortisone	ABCB1	PC, ANXA1, NR3C1	N					0.02	3.34	0.115802	0.684416		ABCB1, NR3C1					Y
Hydroxocobalamin	ABCB1	MMACHC, CUBN, TCN1, MTR	N					0.13		0.115802	0.0576396		ABCB1					Y
Ibuprofen	ABCB1	S100A7, GP1BA, PPARA, CFTR, PPARG, FABP2, THBD, BCL2, PTGS1, PTGS2	N	Yes				0.02		0.115802	1.60939	0.7	ABCB1, BCL2, PTGS2					Y
Idarubicin	ABCB1	TOP2A	Y	Yes				0.04		0.115802	0.326273		ABCB1, TOP2A					N
Indinavir	ABCB1		N	Yes				0.03		0.115802		0.7	ABCB1					N
Irinotecan	ABCB1	TOP1MT, TOP1	Y	Yes				0.01		0.115802	0.189705		ABCB1, TOP1MT, TOP1					N
Isoniazid	ABCB1	CYP2C19, CYP3A4, CYP1A2, CYP2C8, inhA	N					0.08		0.115802	0.601833		ABCB1, CYP2C8					Y
Itraconazole	ABCB1	ERBB2, CYP51A1, ERG11	N	Yes	15	Phase 3	NCT02675452[Phase 1:Suspended:Leukemia, Other Haem-onc];DRKS00012360[Phase 1:Other:Lung];NCT02875223[Phase 1:Recruiting:Multiple cancer types, Lymphoma, Leukemia];JPRN-UMIN000013951[Phase 2:Complete: follow-up continuing:Gynaecological];JPRN-UMIN000018388[Phase 2:Recruiting:Multiple cancer types];JPRN-UMIN000025398[Phase 2:Recruiting:GI];NCT03513211[Phase 1/2:Recruiting:Urological];NCT02366884[Ph…	0.08		0.115802	0.766488	1	ABCB1, ERBB2	Phase 1(4), Phase 1/2(2), Phase 2(7), Phase 3(1), Other(1)	Recruiting(9), Active, not recruiting(2), Completed(1), Not yet recruiting(1), Other(1), Suspended(1)	Leukemia, Other Haem-onc(1), Lung(2), Multiple cancer types, Lymphoma, Leukemia(1), follow-up continuing(1), Multiple cancer types(2), GI(4), Urological(1), Gynaecological(2), Skin(1)	NCT03458221[Phase 3; Not yet recruiting]	Y
Ivermectin	ABCB1		N	Yes	2	Phase 2	NCT05318469[Phase 2:Not yet recruiting:Breast];NCT02366884[Phase 2:Recruiting:Multiple cancer types]	0.26		0.115802		0.7	ABCB1	Phase 2(2)	Recruiting(1), Not yet recruiting(1)	Breast(1), Multiple cancer types(1)		Y
Ketoconazole	ABCB1	NR1I3, NR1I2, KCNH2, CYP21A2, CYP17A1, AR	N	Yes	4	Phase 2	NCT00859781[Phase 2:Active, not recruiting:Urological];NCT03796273[Phase 1:Recruiting:Breast, CNS];2010-021962-31[Phase 2:Ongoing:Urological];NCT03763396[Phase 1:Active, not recruiting:CNS]	0.01		0.115802	0.664239	1	ABCB1, NR1I3, NR1I2, AR	Phase 1(2), Phase 2(2)	Recruiting(1), Active, not recruiting(2), Ongoing(1)	Urological(2), Breast, CNS(1), CNS(1)		Y
Lamotrigine	ABCB1	GRIA1, HTR3A, HTR2A, OPRK1, HRH1, GABRA1, DRD2, DRD1, ADRB1, ADRA2A, ADRA1A, ADORA2A, ADORA1, SCN1A, CACNA1E	N	Yes				0.01		0.115802	4.42047	0.2	ABCB1, OPRK1, SCN1A					Y
Lansoprazole	ABCB1	MAPT, ATP4A	N	Yes	3	Phase 3	NCT04874935[Phase 3:Recruiting:Breast];NCT03647072[Phase 3:Recruiting:Lymphoma];NCT02387203[Phase 2:Active, not recruiting:GI]	0.02		0.115802	0.138188	0.9	ABCB1, MAPT	Phase 2(1), Phase 3(2)	Recruiting(2), Active, not recruiting(1)	Breast(1), Lymphoma(1), GI(1)	NCT04874935[Phase 3; Recruiting], NCT03647072[Phase 3; Recruiting]	Y
Lenalidomide	ABCB1	PTGS2, CDH5, TNFSF11, CRBN	Y	Yes				0.04		0.115802	1.04439		ABCB1, PTGS2, TNFSF11					N
Levetiracetam	ABCB1	CACNA1B, SV2A	N	Yes	2	Phase 2	ChiCTR2100049941[Not available/Missing:Pending:CNS];NCT02815410[Phase 2:Not yet recruiting:CNS]	0.04		0.115802	0.0151871	1	ABCB1	Phase 2(1), Other(1)	Not yet recruiting(2)	CNS(2)		Y
Levofloxacin	ABCB1		N	Yes				0.06		0.115802		0.3	ABCB1					Y
Lonafarnib	ABCB1	FNTB, FNTA	N					0.17		0.115802	0.101624		ABCB1, FNTB					N
Loperamide	ABCB1	NR1I3, CALM1, POMC, CACNA1A, OPRK1, OPRD1, OPRM1	N	Yes				0.03		0.115802	1.74095	0.1	ABCB1, NR1I3, POMC, OPRK1					N
Losartan	ABCB1	AGTR1	N	Yes	12	Phase 3	NCT03878524[Phase 1:Recruiting:Multiple cancer types];NCT03900793[Phase 1:Recruiting:Bone Sarcoma];NCT05077800[Phase 2:Recruiting:GI];NCT05365893[Phase 1:Recruiting:GI];NCT04106856[Phase 1:Recruiting:GI];ACTRN12619001078145[Phase 2:Recruiting:Multiple cancer types];NCT04539808[Phase 2:Recruiting:GI];CTRI/2021/05/033482[Phase 3:Not Yet Recruiting:GI];NCT05097248[Phase 2:Not yet recruiting:Breast];…	0.06		0.115802	0.0504107	0.9	ABCB1	Phase 1(4), Phase 2(7), Phase 3(1)	Recruiting(9), Active, not recruiting(1), Not yet recruiting(2)	Multiple cancer types(3), Bone Sarcoma(1), GI(7), Breast(1)	CTRI/2021/05/033482[Phase 3; Not Yet Recruiting]	N
Lovastatin	ABCB1	HDAC2, ITGAL, HMGCR	N	Yes	1	Other	ChiCTR2000036467[Not available/Missing:Pending:GI]	0.02		0.115802	0.276608	0.8	ABCB1, HDAC2, HMGCR	Other(1)	Not yet recruiting(1)	GI(1)		N
Maprotiline	ABCB1	ADRA2A, DRD2, HTR2C, HTR2A, ADRA1A, CHRM3, CHRM2, CHRM1, HRH1, SLC6A2	N	Yes	1	Phase 1	NCT04200066[Phase 1:Not yet recruiting:CNS]	0.02		0.115802	2.03038	0.7	ABCB1	Phase 1(1)	Not yet recruiting(1)	CNS(1)		N
Medroxyprogesterone Acetate	ABCB1	GABRA1, ESR1, PGR	N							0.115802	1.35802		ABCB1, ESR1, PGR					Y
Mefloquine	ABCB1	ADORA2A	N	Yes	1	Phase 1	NCT01430351[Phase 1:Active, not recruiting:CNS]	0.26		0.115802	0.290806	0.7	ABCB1	Phase 1(1)	Active, not recruiting(1)	CNS(1)		Y
Methadone	ABCB1	CHRNB2, CHRNA4, CHRNA3, CHRNA7, HTR3A, OPRD1, GRIN1, OPRM1	N					0.02		0.115802	2.62382		ABCB1					N
Methylphenidate	ABCB1	HTR1A, SLC6A2, SLC6A3	N					0.01		0.115802	0.414168		ABCB1, SLC6A3					N
Methylprednisolone	ABCB1	ANXA1, NR3C1	N					0.03		0.115802	0.662292		ABCB1, NR3C1					Y
Miconazole	ABCB1	CACNA1C, KCNJ12, KCNA1, KCNMA1, NR1I2, NOS2, NOS3	N	Yes	2	Phase 2	NCT03878524[Phase 1:Recruiting:Multiple cancer types];NCT02366884[Phase 2:Recruiting:Multiple cancer types]	0.04		0.115802	0.325481	0.7	ABCB1, NR1I2	Phase 1(1), Phase 2(1)	Recruiting(2)	Multiple cancer types(2)		Y
Mifepristone	ABCB1	NR1I2, KLK3, NR3C1, PGR	N	Yes	2	Phase 3	NCT05016349[Phase 3:Not yet recruiting:Breast];NCT03225547[Phase 2:Active, not recruiting:Breast]	0.01		0.115802	1.33428	0.8	ABCB1, NR1I2, KLK3, NR3C1, PGR	Phase 2(1), Phase 3(1)	Active, not recruiting(1), Not yet recruiting(1)	Breast(2)	NCT05016349[Phase 3; Not yet recruiting]	N
Miltefosine	ABCB1		N	Yes	2	Phase 2	NCT02788981[Phase 2:Active, not recruiting:Breast];NCT02366884[Phase 2:Recruiting:Multiple cancer types]	0.1		0.115802		0.8	ABCB1	Phase 2(2)	Recruiting(1), Active, not recruiting(1)	Breast(1), Multiple cancer types(1)		N
Mitomycin	ABCB1		Y	Yes				0.02		0.115802			ABCB1					N
Mitoxantrone	ABCB1	TOP2A	Y	Yes				0.01		0.115802	0.326273		ABCB1, TOP2A					Y
Modafinil	ABCB1	ADRA1B, SLC6A3	N					0.05		0.115802	0.503553		ABCB1, SLC6A3					N
Morphine	ABCB1	LY96, OPRD1, OPRK1, OPRM1	N					0.08		0.115802	1.65076		ABCB1, OPRK1					Y
Nefazodone	ABCB1	KCNH2, ADRA1A, ADRA2A, ADRA1B, SLC6A3, SLC6A2, HTR1A, SLC6A4, HTR2C, HTR2A	N					0.05		0.115802	2.04153		ABCB1, SLC6A3					N
Nelfinavir	ABCB1		N	Yes	9	Phase 3	NCT03077451[Phase 2:Active, not recruiting:Soft Tissue Sarcoma];NCT05036226[Phase 1/2:Recruiting:Urological, Multiple cancer types];NCT03256916[Phase 3:Recruiting:Gynaecological];CTRI/2017/08/009265[Phase 3:Open to Recruitment:Gynaecological];NCT02207439[Phase 2:Active, not recruiting:Head and Neck];NCT03829020[Phase 1:Recruiting:Other Haem-onc];ISRCTN50083238[Phase 2:Ongoing:GI];2008-001078-34[P…	0.33		0.115802		0.8	ABCB1	Phase 1(2), Phase 1/2(2), Phase 2(3), Phase 3(2)	Recruiting(5), Active, not recruiting(2), Ongoing(2)	Soft Tissue Sarcoma(1), Urological, Multiple cancer types(1), Gynaecological(3), Head and Neck(1), Other Haem-onc(1), GI(1), CNS(1)	NCT03256916[Phase 3; Recruiting], CTRI/2017/08/009265[Phase 3; Open to Recruitment]	N
Nicardipine	ABCB1	CALM1, CHRM3, CHRM2, CHRM1, ADRA1D, ADRA1B, ADRA1A, PDE1B, PDE1A, CACNA1D, CACNA2D1, CACNB2, CACNA1C	N	Yes	1	Other	ChiCTR-IPR-15006066[Other:Pending:CNS]	0.02		0.115802	1.5265	0.8	ABCB1	Other(1)	Not yet recruiting(1)	CNS(1)		N
Nicotine	ABCB1	CHAT, CYP19A1, CHRNB4, CHRNB3, CHRNA9, CHRNA6, CHRNA5, CHRNA3, CHRNA2, CHRNB2, CHRNA7, CHRNA4	N					0.01		0.115802	0.836228		ABCB1					Y
Nifedipine	ABCB1	CACNA1G, KCND3, CACNB2, CACNA1S, CACNA1D, CALM1, NR1I2, CACNA1C	N	Yes				0.01		0.115802	0.246725	0.8	ABCB1, NR1I2					Y
Nimodipine	ABCB1	AHR, NR3C2, CACNB2, CACNA1S, CACNA1F, CACNA1D, CACNA1C	N	Yes				0.03		0.115802	0.383148	0.2	ABCB1, AHR					Y
Nitrendipine	ABCB1	CACNA1H, CACNA2D2, CACNA1S, CACNA1D, CACNB2, CACNA2D1, CACNA1C	N					0.05		0.115802	0.214816		ABCB1					N
Nortriptyline	ABCB1	CHRM1, PGRMC1, DRD2, ADRB1, ADRA2A, ADRA1B, HTR2C, ADRA1D, ADRA1A, HRH1, HTR1A, HTR2A, SLC6A4, SLC6A2	N					0.05		0.115802	3.53463		ABCB1					Y
Olanzapine	ABCB1	GABRA1, HTR1A, ADRB1, CHRM3, CHRM2, CHRM1, ADRA1B, ADRA1A, HRH1, HTR6, HTR3A, HTR2C, DRD4, DRD3, DRD5, DRD1, DRD2, HTR2A	N	Yes				0.02		0.115802	3.16931	0.2	ABCB1					Y
Omeprazole	ABCB1	AHR, ATP4A	N	Yes	3	Phase 2	NCT04337580[Phase 2:Recruiting:Urological];NCT02950259[Phase 1:Active, not recruiting:Breast];NCT04930991[Phase 1:Recruiting:GI]	0.02		0.115802	0.159405	0.8	ABCB1, AHR	Phase 1(2), Phase 2(1)	Recruiting(2), Active, not recruiting(1)	Urological(1), Breast(1), GI(1)		Y
Ondansetron	ABCB1	HTR1B, HTR1A, OPRM1, HTR4, HTR3A	N					0.09		0.115802	1.69379		ABCB1					Y
Oxcarbazepine	ABCB1	SCN1A	N	Yes				0.03		0.115802	0.111546	0.3	ABCB1, SCN1A					Y
Oxycodone	ABCB1	OPRD1, OPRK1, OPRM1	N					0.09		0.115802	1.64023		ABCB1, OPRK1					N
Pantoprazole	ABCB1	DDAH1, ATP4A	N	Yes	2	Phase 2	CTRI/2018/02/011824[Phase 1/2:Not Yet Recruiting:Head and Neck];NCT01748500[Phase 2:Active, not recruiting:Urological]	0.07		0.115802	0.105566	1	ABCB1	Phase 1/2(1), Phase 2(1)	Active, not recruiting(1), Not yet recruiting(1)	Head and Neck(1), Urological(1)		N
Paroxetine	ABCB1	DRD1, HTR2B, CHRM1, HTR1A, HRH1, DRD2, ADRB1, ADRA2A, ADRA1A, HTR2A, SLC6A2, SLC6A4	N	Yes				0.06		0.115802	2.68862	0.2	ABCB1					N
Pentazocine	ABCB1	SIGMAR1, OPRK1, OPRM1	N					0.09		0.115802	1.18571		ABCB1, OPRK1					N
Phenobarbital	ABCB1	NR1I2, GRIN1, GRIK2, GRIA2, CHRNA7, CHRNA4, GABRA1	N					0.03		0.115802	1.23885		ABCB1, NR1I2					Y
Pravastatin	ABCB1	HDAC2, HMGCR	N	Yes	2	Phase 4	NCT00840177[Phase 2:Active, not recruiting:Leukemia];ChiCTR2000034035[Phase 4:Pending:Breast]	0.03		0.115802	0.255451	0.9	ABCB1, HDAC2, HMGCR	Phase 2(1), Phase 4(1)	Active, not recruiting(1), Not yet recruiting(1)	Leukemia(1), Breast(1)	ChiCTR2000034035[Phase 4; Pending]	N
Prednisone	ABCB1	NR3C1	Y	Yes				0.02		0.115802	0.602812		ABCB1, NR3C1					N
Propafenone	ABCB1	ADRB2, ADRB1, KCNH2, SCN5A	N	Yes				0.03		0.115802	0.989597	0.2	ABCB1, SCN5A					N
Propranolol	ABCB1	EGFR, HTR1B, HTR1A, ADRB3, ADRB2, ADRB1	N	Yes	19	Phase 3	NCT05451043[Phase 2:Not yet recruiting:GI];DRKS00014054[Phase 2:Other:GI];NCT04848519[Phase 2:Recruiting:Urological];ChiCTR2100047864[Phase 2:Pending:GI];NCT04518124[Phase 2:Recruiting:Soft Tissue Sarcoma];CTRI/2019/11/021924[Phase 3:Not Yet Recruiting:Gynaecological];ACTRN12620000156987[Phase 1:Recruiting:Skin];NCT04682158[Phase 2:Recruiting:GI];NCT03384836[Phase 1/2:Recruiting:Skin];NCT02641314…	0.05		0.115802	1.96364	1	ABCB1, EGFR, ADRB3	Phase 1(3), Phase 1/2(1), Phase 2(13), Phase 2/3(1), Phase 3(1)	Recruiting(10), Active, not recruiting(1), Not yet recruiting(7), Other(1)	GI(8), Urological(2), Soft Tissue Sarcoma(2), Gynaecological(1), Skin(3), Other(1), Multiple cancer types(2)	CTRI/2019/11/021924[Phase 3; Not Yet Recruiting]	N
Quinidine	ABCB1	ADRA1D, ADRA1B, ADRA1A, KCNH2, KCNK6, KCNK1, SCN5A	N					0.08		0.115802	1.36896		ABCB1, SCN5A					N
Quinine	ABCB1	KCNN4, GP9	N					0.03		0.115802	0.0502702		ABCB1					Y
Ranitidine	ABCB1	ACHE, HRH2	N	Yes				0.06		0.115802	0.662395	0.8	ABCB1					Y
Ranolazine	ABCB1	ADRB1, ADRA1A, CACNA1C, KCNJ12, SCN1A	N	Yes				0.07		0.115802	0.951286	0.2	ABCB1, SCN1A					N
Remifentanil	ABCB1	OPRK1, OPRD1, OPRM1	N					0.1		0.115802	1.64023		ABCB1, OPRK1					Y
Reserpine	ABCB1	BIRC5, SLC18A1, SLC18A2	N	Yes				0.04		0.115802	0.158254	0.2	ABCB1, BIRC5					N
Rifampicin	ABCB1	NR1I2	N	Yes	1	Phase 1	NCT02875223[Phase 1:Recruiting:Multiple cancer types, Lymphoma, Leukemia]	0.01		0.115802	0.100528	0.3	ABCB1, NR1I2	Phase 1(1)	Recruiting(1)	Multiple cancer types, Lymphoma, Leukemia(1)		Y
Risperidone	ABCB1	DRD1, HTR1A, HTR1D, HTR2C, HRH1, ADRA2C, ADRA1A, ADRA2B, ADRA1B, DRD2, HTR2A	N	Yes				0.03		0.115802	2.62836	0.2	ABCB1					Y
Rituximab	ABCB1	MS4A1	Y	Yes				0.07		0.115802	0.13298		ABCB1, MS4A1					Y
Rivaroxaban	ABCB1	F10	N					0.17		0.115802	0.471814		ABCB1					Y
Rocuronium	ABCB1	HTR3A, CHRM2, CHRNA2	N					0.09		0.115802	0.607944		ABCB1					N
Roxithromycin	ABCB1	rplJ	N	Yes						0.115802		0.3	ABCB1					N
Rucaparib	ABCB1	PARP3, PARP2, PARP1	Y	No				0.01		0.115802	1.37385		ABCB1, PARP3, PARP2, PARP1					N
Saquinavir	ABCB1		N					0.03		0.115802			ABCB1					N
Sertraline	ABCB1	SLC29A4, SLC6A2, PGRMC1, SLC6A3, SLC6A4	N	Yes	1	Phase 1	NCT02891278[Phase 1:Recruiting:Leukemia]	0.06		0.115802	0.748456	0.7	ABCB1, SLC29A4, SLC6A3	Phase 1(1)	Recruiting(1)	Leukemia(1)		Y
Simeprevir	ABCB1		N					0.03		0.115802			ABCB1					N
Simvastatin	ABCB1	HDAC2, ITGAL, HMGCR	N	Yes	18	Phase 4	NCT05464810[Phase 1:Not yet recruiting:Breast];NCT03454529[Phase 2:Active, not recruiting:Breast];NTR988[Phase 2:Suspended:Other Haem-onc];NCT01441349[Phase 2:Active, not recruiting:Lung];NCT04457089[Phase 1:Recruiting:Gynaecological];NCT03324425[Phase 2:Recruiting:Breast];ACTRN12617001087347[Phase 2:Recruiting:GI];NCT03889795[Phase 1:Recruiting:Multiple cancer types];NCT04698941[Phase 2:Recruiti…	0.03		0.115802	0.276608	0.9	ABCB1, HDAC2, HMGCR	Phase 1(4), Phase 2(11), Phase 3(1), Phase 4(2)	Recruiting(7), Active, not recruiting(3), Ongoing(3), Not yet recruiting(4), Suspended(1)	Breast(5), Other Haem-onc(1), Lung(3), Gynaecological(1), GI(6), Multiple cancer types(2)	ChiCTR2000034035[Phase 4; Pending], 2010-018491-24[Phase 4; Ongoing], NCT03971019[Phase 3; Recruiting]	Y
Sirolimus	ABCB1	MTOR	N	Yes	28	Phase 4	NCT04348292[Phase 1:Active, not recruiting:Lung];NCT03217669[Phase 1:Active, not recruiting:Multiple cancer types, Lung];NCT03878524[Phase 1:Recruiting:Multiple cancer types];NTR5584[Phase 1:Recruiting:Multiple cancer types];NCT01737502[Phase 1/2:Recruiting:Lung];NCT05324384[Phase 2:Recruiting:Other];NCT03433183[Phase 2:Active, not recruiting:Soft Tissue Sarcoma];NCT05036226[Phase 1/2:Recruiting:…	0.02		0.115802	0.272489	0.8	ABCB1, MTOR	Phase 1(7), Phase 1/2(4), Phase 2(13), Phase 3(2), Phase 4(1), Other(1)	Recruiting(17), Active, not recruiting(7), Ongoing(3), Not yet recruiting(1)	Lung(2), Multiple cancer types, Lung(1), Multiple cancer types(6), Other(2), Soft Tissue Sarcoma(3), Urological, Multiple cancer types(1), Bone Sarcoma, Soft Tissue Sarcoma(1), Gynaecological(1), Leukemia(3), Endocrine(1), GI(3), CNS(1), Bone Sarcoma(2), Breast(1)	NCT04775173[Phase 3; Recruiting], ChiCTR1900021896[Phase 4; Recruiting], NCT04736589[Phase 3; Not yet recruiting]	Y
Sparfloxacin	ABCB1	TOP2A	N					0.13		0.115802	0.326273		ABCB1, TOP2A					N
Spironolactone	ABCB1	NR1I2, SHBG, SRD5A1, CYP17A1, CYP11B2, NR3C1, PGR, AR, NR3C2	N	Yes				0.04		0.115802	1.75428	0.7	ABCB1, NR1I2, NR3C1, PGR, AR					Y
Sufentanil	ABCB1	OPRK1, OPRD1, OPRM1	N					0.04		0.115802	1.64023		ABCB1, OPRK1					N
Tamoxifen	ABCB1	MAPK8, SHBG, ESRRG, NR1I2, KCNH2, AR, PRKCA, EBP, ESR2, ESR1	Y	Yes						0.115802	1.70642		ABCB1, MAPK8, NR1I2, AR, PRKCA, ESR2, ESR1					N
Temozolomide	ABCB1		Y	Yes	23	Phase 3	2020-003733-38[Phase 1::Mixed pediatric, including Ewing's]; 2014-000259-99[Phase 2:GB - no longer in EU/EEA:Ewing's]; NCT00303940[Phase 1:Completed:Mixed pediatric, including Ewing's]; NCT00020150[Phase 1:Completed:Mixed pediatric, including Ewing's]; NCT04238819/2019-002931-27[Phase 1:Recruiting:Mixed pediatric, including Ewing's]; NCT03715933[Phase 1:Recruiting:Mixed, including sarcomas]; NCT0…	0.03		0.115802			ABCB1	Phase 1(10), Phase 1/2(4), Phase 2(8), Phase 3(1)	Recruiting(8), Active, not recruiting(4), Completed(6), Not yet recruiting(2), Other(2), Terminated(1)	Mixed pediatric, including Ewing's(6), Ewing's(10), Mixed, including sarcomas(4), Ewing's or DSRCT(1), Ewing's or RMS(2)	NCT03495921[Phase 3; Active, not recruiting]	Y
Temsirolimus	ABCB1	MTOR	Y	Yes				0.03		0.115802	0.272489		ABCB1, MTOR					N
Terfenadine	ABCB1	CHRM2, CHRM1, CHRM3, KCNH2, HRH1	N					0.09		0.115802	0.440555		ABCB1					N
Tetrabenazine	ABCB1	DRD2, SLC18A2	N					0.09		0.115802	0.477431		ABCB1					N
Tetracycline	ABCB1	PADI4, PRNP	N					0.02		0.115802	0.159246		ABCB1					Y
Tocofersolan	ABCB1		N							0.115802			ABCB1					N
Topotecan	ABCB1	TOP1MT, TOP1	Y	Yes				0.02		0.115802	0.189705		ABCB1, TOP1MT, TOP1					N
Trabectedin	ABCB1		Y	No				0.17		0.115802			ABCB1					N
Trimetrexate	ABCB1	DHFR	N					0.06		0.115802	0.354091		ABCB1					N
Valganciclovir	ABCB1		N	Yes	5	Phase 2	NCT05431244[Other:Not yet recruiting:GI];NCT05011058[Phase 2:Recruiting:Lymphoma];NCT05166577[Phase 1/2:Recruiting:Head and Neck];NCT04116411[Phase 2:Recruiting:CNS];NCT03397706[Phase 1/2:Recruiting:Multiple cancer types]	0.26		0.115802		0.9	ABCB1	Phase 1/2(2), Phase 2(2), Other(1)	Recruiting(4), Not yet recruiting(1)	GI(1), Lymphoma(1), Head and Neck(1), CNS(1), Multiple cancer types(1)		Y
Vecuronium	ABCB1	CHRNA2	N					0.13		0.115802	0.00258706		ABCB1					N
Vemurafenib	ABCB1	BRAF	Y	Unclear				0.02		0.115802	0.721619		ABCB1, BRAF					N
Venlafaxine	ABCB1	SLC6A3, SLC6A2, SLC6A4	N					0.14		0.115802	0.668442		ABCB1, SLC6A3					N
Vinblastine	ABCB1	JUN, TUBG1, TUBD1, TUBB, TUBA1A	Y	Yes				0.03		0.115802	0.772171		ABCB1, JUN, TUBB, TUBA1A					N
Vindesine	ABCB1	TUBB1	Y	Unclear				0.13		0.115802	0.550742		ABCB1, TUBB1					N
Voriconazole	ABCB1		N					0.09		0.115802			ABCB1					Y
Warfarin	ABCB1	MerTK, AXL, NR1I2, VKORC1	N	Yes	1	Phase 1	NCT03536208[Phase 1:Recruiting:GI]	0.04		0.115802	0.308312	0.9	ABCB1, AXL, NR1I2	Phase 1(1)	Recruiting(1)	GI(1)		N
Abacavir	ABCC1	HLA-B	N	Yes				0.22		0.065924	0.155154	0.7	ABCC1, HLA-B					Y
Azithromycin	ABCC1	PADI4	N	Yes	3	Phase 2	2020-003152-33[Phase 2:Ongoing:Lymphoma];2019-004074-25[Phase 2:Ongoing:Breast];2016-001521-13[Phase 2:Ongoing:Lymphoma]	0.27		0.065924	0.0680574	0.7	ABCC1	Phase 2(3)	Ongoing(3)	Lymphoma(2), Breast(1)		Y
Emtricitabine	ABCC1		N					0.82		0.065924			ABCC1					Y
Indomethacin	ABCC1	EIF2AK2, AKR1C3, PPARA, PTGDR2, GLO1, PPARG, PTGR2, PLA2G2A, PTGS2, PTGS1	N	Yes	5	Phase 4	NCT02935205[Phase 1/2:Recruiting:Urological];NCT02950259[Phase 1:Active, not recruiting:Breast];ChiCTR2000038968[Phase 4:Recruiting:Urological];NCT02609386[Phase 2:Active, not recruiting:Head and Neck];NCT01265849[Phase 3:Active, not recruiting:Head and Neck]	0.07		0.065924	1.53727	0.8	ABCC1, PTGS2	Phase 1(1), Phase 1/2(1), Phase 2(1), Phase 3(1), Phase 4(1)	Recruiting(2), Active, not recruiting(3)	Urological(2), Breast(1), Head and Neck(2)	ChiCTR2000038968[Phase 4; Recruiting], NCT01265849[Phase 3; Active, not recruiting]	Y
Methotrexate	ABCC1	ATIC, TYMS, DHFR	Y	Yes				0.06		0.065924	1.33182		ABCC1					Y
Montelukast	ABCC1	ALOX5, CYSLTR1	N	Yes				0.07		0.065924	0.0800828	0.2	ABCC1					Y
Novobiocin	ABCC1		N					0.49		0.065924			ABCC1					N
Ofloxacin	ABCC1	TOP2A	N					0.22		0.065924	0.326273		ABCC1, TOP2A					Y
Pilocarpine	ABCC1	CHRM2, CHRM1, CHRM3	N					0.19		0.065924	0.0357781		ABCC1					Y
Rimonabant	ABCC1	GPR55, CNR1	N					0.35		0.065924	0.513368		ABCC1					N
Romidepsin	ABCC1	HDAC6, HDAC4, HDAC2, HDAC1	Y	Yes						0.065924	0.460289		ABCC1, HDAC2, HDAC1					N
Sulfinpyrazone	ABCC1	NR1I2, SLC22A12, ABCC2	N					0.93		0.065924	0.159558		ABCC1, NR1I2					N
Tiopronin	ABCC1		N					1.24		0.065924			ABCC1					N
Cisplatin	ABCC1, ABCB1	ATOX1, TF, A2M, MPG	Y	Yes				0.03		0.181726	0.17352		ABCC1, ABCB1, TF					Y
Cyclosporine	ABCC1, ABCB1	PPIF, PPIA, CAMLG	N	Yes	2	Phase 2	NCT00544115[Phase 2:Active, not recruiting:Leukemia];NCT04813653[Phase 1:Recruiting:Other Haem-onc]	0.18		0.181726	0.135955	0.8	ABCC1, ABCB1	Phase 1(1), Phase 2(1)	Recruiting(1), Active, not recruiting(1)	Leukemia(1), Other Haem-onc(1)		N
Daunorubicin	ABCC1, ABCB1	TOP2B, TOP2A	Y	Yes				0.07		0.181726	0.624034		ABCC1, ABCB1, TOP2B, TOP2A					Y
Delavirdine	ABCC1, ABCB1		N					0.59		0.181726			ABCC1, ABCB1					N
Dipyridamole	ABCC1, ABCB1	ORM1, RCAN1, PDE4A, PDE5A, ADA, PDE10A	N	Yes				0.06		0.181726	0.448149	0.7	ABCC1, ABCB1					Y
Docetaxel	ABCC1, ABCB1	NR1I2, MAPT, MAP4, MAP2, BCL2, TUBB1	Y	Yes				0.04		0.181726	0.918637		ABCC1, ABCB1, NR1I2, MAPT, BCL2, TUBB1					N
Doxorubicin	ABCC1, ABCB1	NOLC1, TOP2A	Y	Yes				0.05		0.181726	0.402829		ABCC1, ABCB1, TOP2A					N
Efavirenz	ABCC1, ABCB1		N	Yes				0.39		0.181726		0.7	ABCC1, ABCB1					Y
Erythromycin	ABCC1, ABCB1	KCNH2, MLNR	N					0.14		0.181726	0.0750999		ABCC1, ABCB1					Y
Etoposide	ABCC1, ABCB1	TOP2B, TOP2A	Y	Yes				0.08		0.181726	0.624034		ABCC1, ABCB1, TOP2B, TOP2A					Y
Lamivudine	ABCC1, ABCB1		N					0.31		0.181726			ABCC1, ABCB1					Y
Lopinavir	ABCC1, ABCB1		N	Yes				0.38		0.181726		0.7	ABCC1, ABCB1					N
Melphalan	ABCC1, ABCB1		Y	Yes				0.14		0.181726			ABCC1, ABCB1					Y
Nevirapine	ABCC1, ABCB1		N					0.18		0.181726			ABCC1, ABCB1					Y
Paclitaxel	ABCC1, ABCB1	NR1I2, MAPT, MAP2, MAP4, BCL2, TUBB1	Y	Yes				0.05		0.181726	0.918637		ABCC1, ABCB1, NR1I2, MAPT, BCL2, TUBB1					N
Probenecid	ABCC1, ABCB1	PANX1, SLC22A8, SLC22A6	N					0.42		0.181726	0.0627758		ABCC1, ABCB1					N
Ritonavir	ABCC1, ABCB1	NR1I2	N	Yes	1	Phase 1	NTR3632[Phase 1:Recruiting:Leukemia, Lymphoma]	0.49		0.181726	0.100528	0.8	ABCC1, ABCB1, NR1I2	Phase 1(1)	Recruiting(1)	Leukemia, Lymphoma(1)		Y
Teniposide	ABCC1, ABCB1	TOP2A	N					0.34		0.181726	0.326273		ABCC1, ABCB1, TOP2A					N
Verapamil	ABCC1, ABCB1	ADRA1D, ADRA1B, ADRA1A, SLC6A4, KCNH2, CACNA1H, CACNA1G, KCNJ11, CACNA1A, CACNA1B, CACNA1C	N	Yes	1	Phase 1	NCT03013933[Phase 1:Active, not recruiting:Lymphoma]	0.24		0.181726	1.61766	1	ABCC1, ABCB1	Phase 1(1)	Active, not recruiting(1)	Lymphoma(1)		N
Vincristine	ABCC1, ABCB1	TUBA4A, TUBB	Y	Yes				0.05		0.181726	0.657339		ABCC1, ABCB1, TUBB					N
Zidovudine	ABCC1, ABCB1	TERT	N	Yes	1	Phase 2	IRCT20210703051770N1[Phase 2:Recruiting:Leukemia]	0.12		0.181726	0.394631	0.8	ABCC1, ABCB1, TERT	Phase 2(1)	Recruiting(1)	Leukemia(1)		Y
Fluorouracil	ALCAM, ABCB1	TYMS	Y	Yes				1.18		0.183558	0.408723		ALCAM, ABCB1					N
Testosterone	CAV1	NR3C2, ESR1, AR	N					1.72		0.118071	0.954463		CAV1, ESR1, AR					N
Prednisolone	CD34, ABCB1	NR3C1	Y	Yes				1.27		0.134466	0.602812		CD34, ABCB1, NR3C1					Y
Gentamicin	CD44	DHFR	N					1.96		0.118822	0.354091		CD44					Y
Progesterone	CD44, ABCB1	ESR2, SHBG, AR, NR3C1, ORM1, OPRK1, CYP17A1, NR3C2, ESR1, PGR	N					0.62		0.234624	3.00728		CD44, ABCB1, ESR2, AR, NR3C1, OPRK1, ESR1, PGR					N
Decitabine	DNMT3B	DNMT3A, DNMT1	Y	Yes	1	Phase 1	NCT01241162[Phase 1:Completed:Mixed, including sarcomas]			0.390405	0.920912		DNMT3B, DNMT1	Phase 1(1)	Completed(1)	Mixed, including sarcomas(1)		N
Alprazolam	GABRB3	GABRA1	N					0.1		0.35781	0.485745		GABRB3					N
Bromazepam	GABRB3	GABRA1	N					0.14		0.35781	0.485745		GABRB3					N
Butalbital	GABRB3	GRIK2, GRIA2, CHRNA7, CHRNA4, GABRA6, GABRA5, GABRA4, GABRA3, GABRA2, GABRA1	N					0.05		0.35781	2.95281		GABRB3					N
Chlordiazepoxide	GABRB3	GABRA1	N					0.14		0.35781	0.485745		GABRB3					N
Clobazam	GABRB3	GABRA1	N					0.14		0.35781	0.485745		GABRB3					Y
Clonazepam	GABRB3	NR1I2, GABRA1	N					0.13		0.35781	0.586273		GABRB3, NR1I2					Y
Clorazepic Acid	GABRB3	GABRA1	N					0.1		0.35781	0.485745		GABRB3					N
Clotiazepam	GABRB3	GABRA1	N					0.18		0.35781	0.485745		GABRB3					N
Desflurane	GABRB3	ATP2C1, MT-ND1, KCNA1, GRIA1, GLRA1, GABRA1	N					0.03		0.35781	0.890096		GABRB3, ATP2C1					Y
Diazepam	GABRB3	GABRA1	N					0.17		0.35781	0.485745		GABRB3					Y
Enflurane	GABRB3	GLRA1, GRIN1, ATP2C1, KCNA1, GABRA1	N					0.03		0.35781	1.19093		GABRB3, ATP2C1					N
Estazolam	GABRB3	GABRA1	N					0.22		0.35781	0.485745		GABRB3					N
Eszopiclone	GABRB3	GABRA5, GABRA3, GABRA2, GABRA1	N					0.06		0.35781	1.94815		GABRB3					N
Ethchlorvynol	GABRB3	GABRA1	N					0.06		0.35781	0.485745		GABRB3					N
Etomidate	GABRB3	ADRA2B, GABRA1	N					0.18		0.35781	0.985037		GABRB3					Y
Flumazenil	GABRB3	GABRA5, GABRG2, GABRA1	N					0.05		0.35781	1.45797		GABRB3					Y
Flurazepam	GABRB3	GABRA1	N					0.19		0.35781	0.485745		GABRB3					N
Fospropofol	GABRB3	GABRB2	N					0.75		0.35781	0.357302		GABRB3					N
Glutethimide	GABRB3	GABRA1	N					0.06		0.35781	0.485745		GABRB3					N
Halazepam	GABRB3	GABRA1	N					0.25		0.35781	0.485745		GABRB3					N
Halothane	GABRB3	ATP2B1, NPSR1, GNG2, GABRA1, KCNN4, MT-ND1, KCNJ3, KCNJ6, RHO, GLRA1, GRIN2A, GRIN3B, GRIN3A, KCNMA1, KCNK9, KCNK3	N					0.04		0.35781	2.61556		GABRB3					N
Isoflurane	GABRB3	CHRNB2, CHRNA4, CALM1, KCNA1, GRIA1, GLRA1, ATP2C1, GABRA1	N					0.04		0.35781	1.37663		GABRB3, ATP2C1					Y
Lindane	GABRB3	NR1I2, ESR1, PGR, GABRR1, GLRA3, GLRA2, GLRA1, GABRB1, GLRB	N							0.35781	1.67413		GABRB3, NR1I2, ESR1, PGR					N
Lorazepam	GABRB3	GABRA1	N					0.14		0.35781	0.485745		GABRB3					Y
Meprobamate	GABRB3	GABRA6, GABRA5, GABRA4, GABRA3, GABRA2, GABRA1	N					0.06		0.35781	2.66386		GABRB3					N
Methoxyflurane	GABRB3	MT-ND1, KCNA1, ATP2C1, GLRA1, GRIA1, GABRA1	N					0.05		0.35781	0.890096		GABRB3, ATP2C1					N
Methyprylon	GABRB3	GABRA1	N					0.06		0.35781	0.485745		GABRB3					N
Nitrazepam	GABRB3	SCN1A, GABRA1	N					0.19		0.35781	0.597291		GABRB3, SCN1A					N
Oxazepam	GABRB3	GABRA1	N					0.19		0.35781	0.485745		GABRB3					N
Pentobarbital	GABRB3	NR1I2, GRIN1, GRIK2, GRIA2, CHRNA7, CHRNA4, GABRA6, GABRA5, GABRA4, GABRA3, GABRA2, GABRA1	N					0.05		0.35781	3.41696		GABRB3, NR1I2					N
Prazepam	GABRB3	GABRA1	N					0.18		0.35781	0.485745		GABRB3					N
Primidone	GABRB3	GRIK2, GRIA2, CHRNA7, CHRNA4, GABRA6, GABRA5, GABRA4, GABRA3, GABRA2, GABRA1	N					0.03		0.35781	2.95281		GABRB3					Y
Quazepam	GABRB3	GABRA1	N					0.25		0.35781	0.485745		GABRB3					N
Remimazolam	GABRB3	GABRA1	N					0.06		0.35781	0.485745		GABRB3					N
Talbutal	GABRB3	GRIK2, GRIA2, CHRNA7, CHRNA4, GABRA6, GABRA5, GABRA4, GABRA3, GABRA2, GABRA1	N					0.05		0.35781	2.95281		GABRB3					N
Temazepam	GABRB3	GABRA1	N					0.23		0.35781	0.485745		GABRB3					Y
Topiramate	GABRB3	CACNA1E, CACNA1C, CA3, CA1, CA4, CA2, GRIK1, SCN1A, GABRA1	N	Yes				0.02		0.35781	0.780793	0.2	GABRB3, SCN1A					Y
Triazolam	GABRB3	GABRA1	N					0.17		0.35781	0.485745		GABRB3					N
Midazolam	GABRB3, ABCB1	GABRA1	N	Yes	2	Phase 2	NCT02365597[Phase 2:Recruiting:Urological];CTRI/2021/11/038016[Phase 2:Not Yet Recruiting:Urological]	0.12		0.473612	0.485745	0.2	GABRB3, ABCB1	Phase 2(2)	Recruiting(1), Not yet recruiting(1)	Urological(2)		Y
Propofol	GABRB3, ABCB1	GABRA1, SCN2A, SCN4A, GABRB2	N	Yes	29	Phase 4	DRKS00028966[Phase 2:Recruiting:GI];NCT01975064[Phase 4:Recruiting:Breast, GI];NCT05331911[Phase 4:Not yet recruiting:GI];NCT05343260[Other:Active, not recruiting:Multiple cancer types];NCT04800393[Other:Recruiting:Breast];NCT04475705[Phase 4:Recruiting:Multiple cancer types];JPRN-UMIN000021231[Not available/Missing:Recruiting:Multiple cancer types];NCT04259398[Other:Recruiting:GI];CTRI/2021/12/0…	0.16		0.473612	1.32276	0.9	GABRB3, ABCB1, SCN2A, SCN4A	Phase 2(1), Phase 3(2), Phase 4(7), Other(19)	Recruiting(17), Active, not recruiting(2), Ongoing(1), Not yet recruiting(9)	GI(6), Breast, GI(1), Multiple cancer types(7), Breast(5), Urological(3), Lung(6), CNS(1)	NCT01975064[Phase 4; Recruiting], NCT05331911[Phase 4; Not yet recruiting], NCT04475705[Phase 4; Recruiting], NCT05141877[Phase 4; Not yet recruiting], NCT03034096[Phase 4; Recruiting], NCT04513808[Phase 3; Recruiting], ChiCTR2000040604[Phase 4; Pending], ACTRN12611000301965[Phase 4; Not yet recruiting], 2009-009114-40[Phase 3; Ongoing]	Y
Sevoflurane	GABRB3, ABCB1	CCDC51, MT-ND1, ATP2C1, GRIA1, GLRA1, GABRA1	N					0.04		0.473612	0.881569		GABRB3, ABCB1, ATP2C1					Y
Lifitegrast	ICAM1	ITGAL	N					8.24		0.109549	0.0211573		ICAM1					N
Hyaluronan	ICAM1, CD44	LYVE1, HABP4, IMPG2, TNFAIP6, STAB2, LAYN, HABP2, HAPLN3, HAPLN1, C1QBP, VCAN, NCAN, HMMR	N					10.99		0.228371	0.42745		ICAM1, CD44, HMMR					N
Hyaluronic Acid	ICAM1, CD44	LYVE1, HABP4, IMPG2, TNFAIP6, STAB2, LAYN, HABP2, HAPLN3, HAPLN1, C1QBP, VCAN, NCAN, HMMR	N							0.228371	0.42745		ICAM1, CD44, HMMR					N
Natalizumab	ICAM1, ITGB1	FCGR1A, FCGR3B, ITGA4	N					2.29		0.166638	0.116615		ICAM1, ITGB1					N
Ancestim	KIT		N							0.736814			KIT					N
Avapritinib	KIT		Y	No				2.03		0.736814			KIT					N
Axitinib	KIT	FLT4, KDR, FLT1	Y	No				0.34		0.736814	1.59685		KIT, FLT4, KDR, FLT1					N
Bevacizumab	KIT	FCGR2B, FCGR2A, FCGR1A, FCGR3A, C1QC, C1QB, C1QA, VEGFA	Y	Yes				0.07		0.736814	0.318032		KIT, VEGFA					N
Cabozantinib	KIT	RET, KDR, MET	Y	No	6	Phase 2	NCT05182164[Phase 2:Not yet recruiting:Multiple sarcomas, including Ewing's]; 2019-001238-32[Phase 2::Mixed pediatric, including Ewing's]; NCT05135975[Phase 2:Active, not recruiting:Mixed pediatric, including Ewing's]; NCT02867592[Phase 2:Active, not recruiting:Mixed pediatric, including Ewing's]; NCT04661852[Phase 1:Recruiting:Ewing's or osteosarcoma]; NCT02243605[Phase 2:Active, not recruiting:…	0.36		0.736814	1.26492		KIT, RET, KDR, MET	Phase 1(1), Phase 2(5)	Recruiting(1), Active, not recruiting(3), Not yet recruiting(1), Other(1)	Multiple sarcomas, including Ewing's(1), Mixed pediatric, including Ewing's(3), Ewing's or osteosarcoma(2)		N
Dasatinib	KIT	PPAT, MAPK14, LYN, HSPA8, FRK, FGR, EPHB4, EPHA5, CSK, BCR, NR4A3, BTK, FYN, ABL2, STAT5B, PDGFRB, YES1, LCK, EPHA2, SRC, ABL1	Y	Yes	2	Phase 2	NCT00788125[Phase 1/2:Active, not recruiting:Mixed pediatric, including Ewing's]; NCT00464620[Phase 2:Completed:Multiple sarcomas, including Ewing's]	0.54		0.736814	7.10913		KIT, MAPK14, LYN, HSPA8, EPHB4, CSK, BCR, BTK, PDGFRB, EPHA2, SRC, ABL1	Phase 1/2(1), Phase 2(1)	Active, not recruiting(1), Completed(1)	Mixed pediatric, including Ewing's(1), Multiple sarcomas, including Ewing's(1)		Y
Entrectinib	KIT	TNK2, JAK2, ROS1, NTRK3, NTRK2, NTRK1	Y	No				0.02		0.736814	2.36977		KIT, TNK2, NTRK3, NTRK2, NTRK1					Y
Erdafitinib	KIT	KDR, PDGFRB, PDGFRA, CSF1R, RET, FGFR4, FGFR3, FGFR2, FGFR1	Y	No	1	Phase 2	NCT03210714[Phase 2:Recruiting:Mixed pediatric, including Ewing's]			0.736814	5.26188		KIT, KDR, PDGFRB, PDGFRA, CSF1R, RET, FGFR1	Phase 2(1)	Recruiting(1)	Mixed pediatric, including Ewing's(1)		N
Fostamatinib	KIT	STK17B, STK17A, STK16, STK10, SRMS, SRC, SNRK, SLK, SIK2, SIK1, SGK3, SBK1, RPS6KA3, RPS6KA1, ROS1, ROCK2, RIPK4, RIPK2, RIPK1, RIOK3, RIOK2, RIOK1, RET, RAF1, PTK6, PTK2B, PTK2, PRPF4B, PRKG2, PRKD1, PRKCQ, PRKCI, PRKCG, PRKCE, PRKCD, PRKACB, PRKAA1, PLK4, PLK3, PLK2, PLK1, PKN2, PKN1, PKMYT1, PIP4K2C, PIP4K2B, PIM3, PIM1, PIK3CG, PIK3CD, PIK3C2G, PIK3C2B, PI4KB, PHKG1, CDK15, PDPK1, PDGFRB, PDG…	N	No	2	Phase 1	NCT03246074[Phase 1:Recruiting:Gynaecological];NCT05030675[Phase 1:Recruiting:Other Haem-onc, Leukemia]			0.736814	36.0811	0.7	KIT, STK10, SRC, SIK1, RPS6KA1, ROCK2, RET, PTK2B, PTK2, PRKG2, PRKCD, PLK4, PLK3, PLK1, PIM3, PIK3CG, PIK3CD, PDGFRB, PDGFRA, PAK3, PAK1, NTRK3, NTRK2, NTRK1, NEK2, MST1R, MAPK14, MAP3K3, MAP2K2, LYN, LIMK1, KDR, ITK, INSRR, INSR, GSK3A, MTOR, FLT4, FLT3, FLT1, FGFR1, ERN1, ERBB4, ERBB2, EPHB4, EPHB2, EPHA3, EPHA2, EIF2AK4, EGFR, DYRK1B, DCLK3, DCLK1, CSK, CSF1R, CHEK2, CHEK1, CDK4, BTK, BRAF, A…	Phase 1(2)	Recruiting(2)	Gynaecological(1), Other Haem-onc, Leukemia(1)		N
Infigratinib	KIT	FGFR4, FGFR3, FGFR2, FGFR1	Y	No				0.09		0.736814	2.77522		KIT, FGFR1					N
Lenvatinib	KIT	RET, PDGFRA, FGFR4, FGFR3, FGFR2, FGFR1, FLT4, KDR, FLT1	Y	No	1	Phase 1/2	NCT03245151[Phase 1/2:Active, not recruiting:Mixed pediatric, including Ewing's]	0.17		0.736814	5.20971		KIT, RET, PDGFRA, FGFR1, FLT4, KDR, FLT1	Phase 1/2(1)	Active, not recruiting(1)	Mixed pediatric, including Ewing's(1)		N
Midostaurin	KIT	FLT3, PDGFRB, PDGFRA, KDR, PRKCA	Y	No				0.36		0.736814	2.64272		KIT, FLT3, PDGFRB, PDGFRA, KDR, PRKCA					N
Nilotinib	KIT	ABL1	Y	Yes				1.84		0.736814	0.305397		KIT, ABL1					Y
Pazopanib	KIT	SH2B3, FGF1, ITK, FGFR3, PDGFRB, PDGFRA, FLT4, KDR, FLT1	Y	Yes	1	Phase 2	2013-003595-12[Phase 2:Completed:Mixed pediatric, including Ewing's]	0.1		0.736814	4.58535		KIT, ITK, PDGFRB, PDGFRA, FLT4, KDR, FLT1	Phase 2(1)	Completed(1)	Mixed pediatric, including Ewing's(1)		N
Pembrolizumab	KIT	PDCD1	Y	No				0.09		0.736814	0.41992		KIT, PDCD1					Y
Pexidartinib	KIT	PDGFRB, FLT3, CSF1R	N					1.18		0.736814	1.59952		KIT, PDGFRB, FLT3, CSF1R					N
Ponatinib	KIT	EphA2, PDGFRA, KDR, LYN, SRC, LCK, FGFR4, FGFR3, FGFR2, FGFR1, FLT3, TEK, RET, BCR, ABL1	Y	No				0.6		0.736814	8.06956		KIT, EphA2, PDGFRA, KDR, LYN, SRC, FGFR1, FLT3, TEK, RET, BCR, ABL1					N
Regorafenib	KIT	RET, ABL1, FRK, MAPK11, BRAF, RAF1, EPHA2, NTRK1, DDR2, TEK, FGFR2, FGFR1, PDGFRB, PDGFRA, FLT4, KDR, FLT1	Y	No	5	Phase 2	NCT04055220[Other:Recruiting:Multiple sarcomas, including Ewing's]; NCT05395741[Phase 1/2:Recruiting:Ewing's or osteosarcoma]; NCT02085148/2013-003579-36[Phase 1:Active, not recruiting:Mixed pediatric, including Ewing's]; NCT02048371[Phase 2:Recruiting:Multiple sarcomas, including Ewing's]; NCT02389244/2013-003910-42[Phase 2:Recruiting:Multiple sarcomas, including Ewing's]	0.4		0.736814	7.35133		KIT, RET, ABL1, BRAF, EPHA2, NTRK1, TEK, FGFR1, PDGFRB, PDGFRA, FLT4, KDR, FLT1	Phase 1(1), Phase 1/2(1), Phase 2(2), Other(1)	Recruiting(4), Active, not recruiting(1)	Multiple sarcomas, including Ewing's(3), Ewing's or osteosarcoma(1), Mixed pediatric, including Ewing's(1)		N
Ripretinib	KIT	PDGFRA, BRAF, KDR, TEK, PDGFRB	Y	No				2.03		0.736814	2.78254		KIT, PDGFRA, BRAF, KDR, TEK, PDGFRB					N
Romiplostim	KIT	MPL	N					0.13		0.736814	0.0533058		KIT, MPL					Y
Tivozanib	KIT	MET, FGFR1, TEK, PTK6, PDGFRA, FLT3, PDGFRB, FLT4, KDR, FLT1	Y	No						0.736814	4.87919		KIT, MET, FGFR1, TEK, PDGFRA, FLT3, PDGFRB, FLT4, KDR, FLT1					N
Trametinib	KIT	MAP2K2, MAP2K1	Y	No				0.05		0.736814	1.28929		KIT, MAP2K2, MAP2K1					N
Cytarabine	KIT, ABCB1	POLB	Y	Yes				0.08		0.852616	0.0269298		KIT, ABCB1					Y
Imatinib	KIT, ABCB1	PDGFRB, ABL1, DDR1, PDGFRA, CSF1R, NTRK1, RET, BCR	Y	Yes	4	Phase 2	NCT00154388[Phase 2:Completed:Mixed, including sarcomas]; NCT00031915[Phase 2:Completed:Multiple sarcomas, including Ewing's]; NCT00030667[Phase 2:Completed:Mixed pediatric, including Ewing's]; NCT00062205[Phase 2:Completed:Ewing's or DSRCT]	1.59		0.852616	3.35159		KIT, ABCB1, PDGFRB, ABL1, PDGFRA, CSF1R, NTRK1, RET, BCR	Phase 2(4)	Completed(4)	Mixed, including sarcomas(1), Multiple sarcomas, including Ewing's(1), Mixed pediatric, including Ewing's(1), Ewing's or DSRCT(1)		Y
Sorafenib	KIT, ABCB1	FLT1, RET, FGFR1, PDGFRB, FLT3, KDR, FLT4, RAF1, BRAF	Y	Unclear	2	Phase 2	NCT01946529[Phase 2:Active, not recruiting:Ewing's or DSRCT]; NCT01518413[Phase 1:Completed:Mixed pediatric, including Ewing's]	0.34		0.852616	4.97495		KIT, ABCB1, FLT1, RET, FGFR1, PDGFRB, FLT3, KDR, FLT4, BRAF	Phase 1(1), Phase 2(1)	Active, not recruiting(1), Completed(1)	Ewing's or DSRCT(1), Mixed pediatric, including Ewing's(1)		N
Sunitinib	KIT, ABCB1	PDGFRA, CSF1R, FLT3, FLT4, KDR, FLT1, PDGFRB	Y	Yes	2	Phase 2	2016-004040-10[Phase 1/2:Ongoing:Multiple sarcomas, including Ewing's]; NCT00474994[Phase 2:Completed:Mixed, including sarcomas]	0.92		0.852616	3.89826		KIT, ABCB1, PDGFRA, CSF1R, FLT3, FLT4, KDR, FLT1, PDGFRB	Phase 1/2(1), Phase 2(1)	Ongoing(1), Completed(1)	Multiple sarcomas, including Ewing's(1), Mixed, including sarcomas(1)		N
Allopurinol	POU5F1	XDH	N	Yes	1	Phase 1/2	NCT05049863[Phase 1/2:Not yet recruiting:Lung]	1.07		0.0906791	0.380302	0.7	POU5F1	Phase 1/2(1)	Not yet recruiting(1)	Lung(1)		Y
Carbamazepine	POU5F1	NR1I2, CHRNA4, SCN1A	N					0.34		0.0906791	0.48323		POU5F1, NR1I2, SCN1A					Y
Phenytoin	POU5F1	GABRA1, SCN8A, SCN2A, CACNA1C, KCNH2, SCN3A, SCN1B, NR1I2, SCN1A, SCN5A	N	Yes	1	Phase 2	NCT03778996[Phase 2:Recruiting:Bone Sarcoma, Soft Tissue Sarcoma]	0.4		0.0906791	1.28976	0.7	POU5F1, SCN8A, SCN2A, SCN3A, NR1I2, SCN1A, SCN5A	Phase 2(1)	Recruiting(1)	Bone Sarcoma, Soft Tissue Sarcoma(1)		Y
Aldesleukin	VIM	IL2RG, IL2RA, IL2RB	Y	Unclear				1.59		0.109738	0.223747		VIM, IL2RG					N
Artenimol	VIM	ALB, pdx1, vapA, OAT, NPM1, DDX39B, SHMT2, DDX5, P4HB, MYH9, PGAM1, CYCS, ALDOA, TUBB4A, TUBB6, HSPA8, ZYX, TUBA1A, TPM1, TPI1, TAGLN2, TAGLN, SRSF4, SRP14, SNRPD2, SFPQ, SF1, RPS9, RPS8, RPS6, RPS5, RPS28, RPS19, RPS18, RPS17, RPS13, RPL4, RPL35, RPL23A, RPL14, RPL10, PRDX1, PPIA, PKM, PGK1, PFN1, NPEPPS, MDH1, MAP4, LGALS1, LDHB, LDHA, KHSRP, IQGAP1, HSPB1, HP1BP3, HNRNPK, HNRNPD, HNRNPA2B1, GP…	N							0.109738	7.94184		VIM, ALB, NPM1, PGAM1, TUBB4A, TUBB6, HSPA8, ZYX, TUBA1A, SRP14, PRDX1, PKM, LGALS1, LDHA, HSPB1, HNRNPK, CFL1					N
Bosutinib		EphA2	Y	Unclear							0.223401		EphA2					N
Mebendazole		MAPK14	N	Yes	7	Phase 3	NCT03878524[Phase 1:Recruiting:Multiple cancer types];NCT01837862[Phase 1/2:Recruiting:CNS];NCT02366884[Phase 2:Recruiting:Multiple cancer types];CTRI/2018/01/011542[Phase 1/2:Open to Recruitment:CNS];CTRI/2020/06/026240[Not available/Missing:Open to Recruitment:GI];NCT04443049[Other:Recruiting:GI];NCT03925662[Phase 3:Recruiting:GI]				0.115415	0.8	MAPK14	Phase 1(1), Phase 1/2(2), Phase 2(1), Phase 3(1), Other(2)	Recruiting(7)	Multiple cancer types(2), CNS(2), GI(3)	NCT03925662[Phase 3; Recruiting]	Y
Meclofenamic Acid		GJA1	N								0.0515818		GJA1					N
Tegaserod		RPS6	N	Yes							0.380509	0.2						N
Trimetazidine		HADHA	N	Yes							0.0324487	0.7						N

## Sheet: Supplementary Data 8
Drug	Ewings sarcoma Targets	Cancer Drug	BNFC	Off-Patent	Trial Count	Max Trial Phase	Trials	Trials By Phase	Trials By Status	Trials By Cancer	Advanced Trials
Cabozantinib	KIT, RET, KDR, MET	Y	N	No	6	Phase 2	NCT05182164[Phase 2:Not yet recruiting:Multiple sarcomas, including Ewing's]; 2019-001238-32[Phase 2::Mixed pediatric, including Ewing's]; NCT05135975[Phase 2:Active, not recruiting:Mixed pediatric, including Ewing's]; NCT02867592[Phase 2:Active, not recruiting:Mixed pediatric, including Ewing's]; NCT04661852[Phase 1:Recruiting:Ewing's or osteosarcoma]; NCT02243605[Phase 2:Active, not recruiting:…	Phase 1(1), Phase 2(5)	Recruiting(1), Active, not recruiting(3), Not yet recruiting(1), Other(1)	Multiple sarcomas, including Ewing's(1), Mixed pediatric, including Ewing's(3), Ewing's or osteosarcoma(2)
Dasatinib	KIT, MAPK14, LYN, HSPA8, EPHB4, CSK, BCR, BTK, PDGFRB, EPHA2, SRC, ABL1	Y	Y	Yes	2	Phase 2	NCT00788125[Phase 1/2:Active, not recruiting:Mixed pediatric, including Ewing's]; NCT00464620[Phase 2:Completed:Multiple sarcomas, including Ewing's]	Phase 1/2(1), Phase 2(1)	Active, not recruiting(1), Completed(1)	Mixed pediatric, including Ewing's(1), Multiple sarcomas, including Ewing's(1)
Decitabine	DNMT3B, DNMT1	Y	N	Yes	1	Phase 1	NCT01241162[Phase 1:Completed:Mixed, including sarcomas]	Phase 1(1)	Completed(1)	Mixed, including sarcomas(1)
Erdafitinib	KIT, KDR, PDGFRB, PDGFRA, CSF1R, RET, FGFR1	Y	N	No	1	Phase 2	NCT03210714[Phase 2:Recruiting:Mixed pediatric, including Ewing's]	Phase 2(1)	Recruiting(1)	Mixed pediatric, including Ewing's(1)
Imatinib	KIT, ABCB1, PDGFRB, ABL1, PDGFRA, CSF1R, NTRK1, RET, BCR	Y	Y	Yes	4	Phase 2	NCT00154388[Phase 2:Completed:Mixed, including sarcomas]; NCT00031915[Phase 2:Completed:Multiple sarcomas, including Ewing's]; NCT00030667[Phase 2:Completed:Mixed pediatric, including Ewing's]; NCT00062205[Phase 2:Completed:Ewing's or DSRCT]	Phase 2(4)	Completed(4)	Mixed, including sarcomas(1), Multiple sarcomas, including Ewing's(1), Mixed pediatric, including Ewing's(1), Ewing's or DSRCT(1)
Lenvatinib	KIT, RET, PDGFRA, FGFR1, FLT4, KDR, FLT1	Y	N	No	1	Phase 1/2	NCT03245151[Phase 1/2:Active, not recruiting:Mixed pediatric, including Ewing's]	Phase 1/2(1)	Active, not recruiting(1)	Mixed pediatric, including Ewing's(1)
Pazopanib	KIT, ITK, PDGFRB, PDGFRA, FLT4, KDR, FLT1	Y	N	Yes	1	Phase 2	2013-003595-12[Phase 2:Completed:Mixed pediatric, including Ewing's]	Phase 2(1)	Completed(1)	Mixed pediatric, including Ewing's(1)
Regorafenib	KIT, RET, ABL1, BRAF, EPHA2, NTRK1, TEK, FGFR1, PDGFRB, PDGFRA, FLT4, KDR, FLT1	Y	N	No	5	Phase 2	NCT04055220[Other:Recruiting:Multiple sarcomas, including Ewing's]; NCT05395741[Phase 1/2:Recruiting:Ewing's or osteosarcoma]; NCT02085148/2013-003579-36[Phase 1:Active, not recruiting:Mixed pediatric, including Ewing's]; NCT02048371[Phase 2:Recruiting:Multiple sarcomas, including Ewing's]; NCT02389244/2013-003910-42[Phase 2:Recruiting:Multiple sarcomas, including Ewing's]	Phase 1(1), Phase 1/2(1), Phase 2(2), Other(1)	Recruiting(4), Active, not recruiting(1)	Multiple sarcomas, including Ewing's(3), Ewing's or osteosarcoma(1), Mixed pediatric, including Ewing's(1)
Sorafenib	KIT, ABCB1, FLT1, RET, FGFR1, PDGFRB, FLT3, KDR, FLT4, BRAF	Y	N	Unclear	2	Phase 2	NCT01946529[Phase 2:Active, not recruiting:Ewing's or DSRCT]; NCT01518413[Phase 1:Completed:Mixed pediatric, including Ewing's]	Phase 1(1), Phase 2(1)	Active, not recruiting(1), Completed(1)	Ewing's or DSRCT(1), Mixed pediatric, including Ewing's(1)
Sunitinib	KIT, ABCB1, PDGFRA, CSF1R, FLT3, FLT4, KDR, FLT1, PDGFRB	Y	N	Yes	2	Phase 2	2016-004040-10[Phase 1/2:Ongoing:Multiple sarcomas, including Ewing's]; NCT00474994[Phase 2:Completed:Mixed, including sarcomas]	Phase 1/2(1), Phase 2(1)	Ongoing(1), Completed(1)	Multiple sarcomas, including Ewing's(1), Mixed, including sarcomas(1)
Temozolomide	ABCB1	Y	Y	Yes	23	Phase 3	2020-003733-38[Phase 1::Mixed pediatric, including Ewing's]; 2014-000259-99[Phase 2:GB - no longer in EU/EEA:Ewing's]; NCT00303940[Phase 1:Completed:Mixed pediatric, including Ewing's]; NCT00020150[Phase 1:Completed:Mixed pediatric, including Ewing's]; NCT04238819/2019-002931-27[Phase 1:Recruiting:Mixed pediatric, including Ewing's]; NCT03715933[Phase 1:Recruiting:Mixed, including sarcomas]; NCT0…	Phase 1(10), Phase 1/2(4), Phase 2(8), Phase 3(1)	Recruiting(8), Active, not recruiting(4), Completed(6), Not yet recruiting(2), Other(2), Terminated(1)	Mixed pediatric, including Ewing's(6), Ewing's(10), Mixed, including sarcomas(4), Ewing's or DSRCT(1), Ewing's or RMS(2)	NCT03495921[Phase 3; Active, not recruiting]
Aliskiren	ABCB1	N	N	Yes	1	Phase 2	ACTRN12619001078145[Phase 2:Recruiting:Multiple cancer types]	Phase 2(1)	Recruiting(1)	Multiple cancer types(1)
Allopurinol	POU5F1	N	Y	Yes	1	Phase 1/2	NCT05049863[Phase 1/2:Not yet recruiting:Lung]	Phase 1/2(1)	Not yet recruiting(1)	Lung(1)
Atorvastatin	ABCB1, NR1I3, HDAC2, AHR, DPP4, HMGCR	N	Y	Yes	16	Phase 3	NCT03560882[Phase 1:Recruiting:Multiple cancer types, Leukemia];NCT03024684[Phase 3:Recruiting:GI];NCT03872388[Phase 2:Recruiting:Breast];NCT05103644[Phase 2/3:Recruiting:Breast];NCT04862260[Phase 1:Recruiting:GI];CTRI/2018/07/014865[Phase 1:Not Yet Recruiting:GI];2014-005508-62[Phase 2:Ongoing:Breast];NCT03819101[Phase 3:Recruiting:Urological];NCT03971019[Phase 3:Recruiting:Breast];NCT02958852[P…	Phase 1(4), Phase 2(6), Phase 2/3(1), Phase 3(5)	Recruiting(13), Ongoing(1), Not yet recruiting(2)	Multiple cancer types, Leukemia(1), GI(4), Breast(8), Urological(3)	NCT03024684[Phase 3; Recruiting], NCT03819101[Phase 3; Recruiting], NCT03971019[Phase 3; Recruiting], NCT04601116[Phase 3; Recruiting], NCT04026230[Phase 3; Recruiting]
Azithromycin	ABCC1	N	Y	Yes	3	Phase 2	2020-003152-33[Phase 2:Ongoing:Lymphoma];2019-004074-25[Phase 2:Ongoing:Breast];2016-001521-13[Phase 2:Ongoing:Lymphoma]	Phase 2(3)	Ongoing(3)	Lymphoma(2), Breast(1)
Carvedilol	ABCB1, HIF1A, GJA1, VEGFA	N	Y	Yes	2	Phase 2	NCT02944201[Phase 2:Active, not recruiting:Urological];NCT03980249[Phase 1:Not yet recruiting:CNS]	Phase 1(1), Phase 2(1)	Active, not recruiting(1), Not yet recruiting(1)	Urological(1), CNS(1)
Chlorpromazine	ABCB1	N	N	Yes	3	Phase 2	NCT05433402[Phase 1/2:Not yet recruiting:GI];NCT05190315[Phase 1:Recruiting:CNS];NCT04224441[Phase 2:Recruiting:CNS]	Phase 1(1), Phase 1/2(1), Phase 2(1)	Recruiting(2), Not yet recruiting(1)	GI(1), CNS(2)
Citalopram	ABCB1	N	Y	Yes	1	Phase 3	2013-004705-59[Phase 3:Ongoing:CNS]	Phase 3(1)	Ongoing(1)	CNS(1)	2013-004705-59[Phase 3; Ongoing]
Clarithromycin	ABCB1	N	Y	Yes	18	Phase 4	NCT03031483[Phase 2:Active, not recruiting:Lymphoma];NCT02343042[Phase 1/2:Recruiting:Other Haem-onc];NCT04302324[Phase 2:Recruiting:Other Haem-onc];JPRN-UMIN000024166[Phase 2::Other Haem-onc];NCT01559935[Phase 2:Active, not recruiting:Other Haem-onc];NCT02542657[Phase 1/2:Active, not recruiting:Other Haem-onc];NCT02366884[Phase 2:Recruiting:Multiple cancer types];ChiCTR2100047608[Phase 4:Recruit…	Phase 1/2(2), Phase 2(10), Phase 3(3), Phase 4(1), Other(2)	Recruiting(8), Active, not recruiting(8), Not yet recruiting(1), Other(1)	Lymphoma(1), Other Haem-onc(15), Multiple cancer types(1), GI(1)	ChiCTR2100047608[Phase 4; Recruiting], NCT02575144[Phase 3; Active, not recruiting], NCT02516696[Phase 3; Active, not recruiting], NCT04287660[Phase 3; Recruiting]
Clopidogrel	ABCB1	N	N	Yes	1	Phase 1	NCT03245489[Phase 1:Recruiting:Head and Neck]	Phase 1(1)	Recruiting(1)	Head and Neck(1)
Colchicine	ABCB1, TUBB	N	N	Yes	2	Phase 2	NCT05279690[Phase 1:Recruiting:Urological, Multiple cancer types];NCT04264260[Phase 2:Recruiting:GI]	Phase 1(1), Phase 2(1)	Recruiting(2)	Urological, Multiple cancer types(1), GI(1)
Cyclosporine	ABCC1, ABCB1	N	N	Yes	2	Phase 2	NCT00544115[Phase 2:Active, not recruiting:Leukemia];NCT04813653[Phase 1:Recruiting:Other Haem-onc]	Phase 1(1), Phase 2(1)	Recruiting(1), Active, not recruiting(1)	Leukemia(1), Other Haem-onc(1)
Deferoxamine	ABCB1	N	N	Yes	4	Phase 3	NCT05184816[Phase 1:Recruiting:Multiple cancer types];NCT05300958[Phase 2:Recruiting:Breast];IRCT20200313046756N2[Phase 3:Pending:Leukemia];NCT03652467[Phase 1:Recruiting:GI]	Phase 1(2), Phase 2(1), Phase 3(1)	Recruiting(3), Not yet recruiting(1)	Multiple cancer types(1), Breast(1), Leukemia(1), GI(1)	IRCT20200313046756N2[Phase 3; Pending]
Digoxin	ABCB1	N	Y	Yes	2	Phase 2	NCT04141995[Phase 2:Recruiting:GI];NCT03889795[Phase 1:Recruiting:Multiple cancer types]	Phase 1(1), Phase 2(1)	Recruiting(2)	GI(1), Multiple cancer types(1)
Disulfiram	ABCB1	N	N	Yes	13	Phase 2/3	NCT02671890[Phase 1:Recruiting:Multiple cancer types, GI];NCT05210374[Phase 1:Not yet recruiting:Soft Tissue Sarcoma, Bone Sarcoma];NCT02715609[Phase 1/2:Recruiting:CNS];NCT04521335[Phase 1:Recruiting:Other Haem-onc];NCT03363659[Phase 2:Active, not recruiting:CNS];2019-000558-68[Phase 2:Ongoing:Urological];2019-001972-12[Phase 1/2:Ongoing:Multiple cancer types, Breast];2019-002748-25[Phase 2:Ongo…	Phase 1(4), Phase 1/2(2), Phase 2(6), Phase 2/3(1)	Recruiting(7), Active, not recruiting(2), Ongoing(3), Not yet recruiting(1)	Multiple cancer types, GI(1), Soft Tissue Sarcoma, Bone Sarcoma(1), CNS(3), Other Haem-onc(1), Urological(2), Multiple cancer types, Breast(1), GI(2), Breast(2)
Doxycycline	ABCB1	N	Y	Yes	10	Phase 2	RPCEC00000367[Phase 2:Recruiting:Urological];NCT01820910[Phase 2:Active, not recruiting:Lymphoma];NCT02366884[Phase 2:Recruiting:Multiple cancer types];NCT02874430[Phase 2:Active, not recruiting:Breast, Gynaecological];2016-000871-26[Phase 2:Ongoing:Breast];NCT02775695[Phase 2:Active, not recruiting:GI];ACTRN12620000815965[Phase 2:Not yet recruiting:GI];NCT03076281[Phase 2:Active, not recruiting:…	Phase 1(1), Phase 2(9)	Recruiting(4), Active, not recruiting(4), Ongoing(1), Not yet recruiting(1)	Urological(1), Lymphoma(3), Multiple cancer types(1), Breast, Gynaecological(1), Breast(1), GI(2), Head and Neck(1)
Fenofibrate	ABCB1, NR1I2	N	Y	Yes	1	Phase 2	NCT01356290[Phase 2:Recruiting:CNS]	Phase 2(1)	Recruiting(1)	CNS(1)
Fostamatinib	KIT, STK10, SRC, SIK1, RPS6KA1, ROCK2, RET, PTK2B, PTK2, PRKG2, PRKCD, PLK4, PLK3, PLK1, PIM3, PIK3CG, PIK3CD, PDGFRB, PDGFRA, PAK3, PAK1, NTRK3, NTRK2, NTRK1, NEK2, MST1R, MAPK14, MAP3K3, MAP2K2, LYN, LIMK1, KDR, ITK, INSRR, INSR, GSK3A, MTOR, FLT4, FLT3, FLT1, FGFR1, ERN1, ERBB4, ERBB2, EPHB4, EPHB2, EPHA3, EPHA2, EIF2AK4, EGFR, DYRK1B, DCLK3, DCLK1, CSK, CSF1R, CHEK2, CHEK1, CDK4, BTK, BRAF, A…	N	N	No	2	Phase 1	NCT03246074[Phase 1:Recruiting:Gynaecological];NCT05030675[Phase 1:Recruiting:Other Haem-onc, Leukemia]	Phase 1(2)	Recruiting(2)	Gynaecological(1), Other Haem-onc, Leukemia(1)
Indomethacin	ABCC1, PTGS2	N	Y	Yes	5	Phase 4	NCT02935205[Phase 1/2:Recruiting:Urological];NCT02950259[Phase 1:Active, not recruiting:Breast];ChiCTR2000038968[Phase 4:Recruiting:Urological];NCT02609386[Phase 2:Active, not recruiting:Head and Neck];NCT01265849[Phase 3:Active, not recruiting:Head and Neck]	Phase 1(1), Phase 1/2(1), Phase 2(1), Phase 3(1), Phase 4(1)	Recruiting(2), Active, not recruiting(3)	Urological(2), Breast(1), Head and Neck(2)	ChiCTR2000038968[Phase 4; Recruiting], NCT01265849[Phase 3; Active, not recruiting]
Itraconazole	ABCB1, ERBB2	N	Y	Yes	15	Phase 3	NCT02675452[Phase 1:Suspended:Leukemia, Other Haem-onc];DRKS00012360[Phase 1:Other:Lung];NCT02875223[Phase 1:Recruiting:Multiple cancer types, Lymphoma, Leukemia];JPRN-UMIN000013951[Phase 2:Complete: follow-up continuing:Gynaecological];JPRN-UMIN000018388[Phase 2:Recruiting:Multiple cancer types];JPRN-UMIN000025398[Phase 2:Recruiting:GI];NCT03513211[Phase 1/2:Recruiting:Urological];NCT02366884[Ph…	Phase 1(4), Phase 1/2(2), Phase 2(7), Phase 3(1), Other(1)	Recruiting(9), Active, not recruiting(2), Completed(1), Not yet recruiting(1), Other(1), Suspended(1)	Leukemia, Other Haem-onc(1), Lung(2), Multiple cancer types, Lymphoma, Leukemia(1), follow-up continuing(1), Multiple cancer types(2), GI(4), Urological(1), Gynaecological(2), Skin(1)	NCT03458221[Phase 3; Not yet recruiting]
Ivermectin	ABCB1	N	Y	Yes	2	Phase 2	NCT05318469[Phase 2:Not yet recruiting:Breast];NCT02366884[Phase 2:Recruiting:Multiple cancer types]	Phase 2(2)	Recruiting(1), Not yet recruiting(1)	Breast(1), Multiple cancer types(1)
Ketoconazole	ABCB1, NR1I3, NR1I2, AR	N	Y	Yes	4	Phase 2	NCT00859781[Phase 2:Active, not recruiting:Urological];NCT03796273[Phase 1:Recruiting:Breast, CNS];2010-021962-31[Phase 2:Ongoing:Urological];NCT03763396[Phase 1:Active, not recruiting:CNS]	Phase 1(2), Phase 2(2)	Recruiting(1), Active, not recruiting(2), Ongoing(1)	Urological(2), Breast, CNS(1), CNS(1)
Lansoprazole	ABCB1, MAPT	N	Y	Yes	3	Phase 3	NCT04874935[Phase 3:Recruiting:Breast];NCT03647072[Phase 3:Recruiting:Lymphoma];NCT02387203[Phase 2:Active, not recruiting:GI]	Phase 2(1), Phase 3(2)	Recruiting(2), Active, not recruiting(1)	Breast(1), Lymphoma(1), GI(1)	NCT04874935[Phase 3; Recruiting], NCT03647072[Phase 3; Recruiting]
Levetiracetam	ABCB1	N	Y	Yes	2	Phase 2	ChiCTR2100049941[Not available/Missing:Pending:CNS];NCT02815410[Phase 2:Not yet recruiting:CNS]	Phase 2(1), Other(1)	Not yet recruiting(2)	CNS(2)
Losartan	ABCB1	N	N	Yes	12	Phase 3	NCT03878524[Phase 1:Recruiting:Multiple cancer types];NCT03900793[Phase 1:Recruiting:Bone Sarcoma];NCT05077800[Phase 2:Recruiting:GI];NCT05365893[Phase 1:Recruiting:GI];NCT04106856[Phase 1:Recruiting:GI];ACTRN12619001078145[Phase 2:Recruiting:Multiple cancer types];NCT04539808[Phase 2:Recruiting:GI];CTRI/2021/05/033482[Phase 3:Not Yet Recruiting:GI];NCT05097248[Phase 2:Not yet recruiting:Breast];…	Phase 1(4), Phase 2(7), Phase 3(1)	Recruiting(9), Active, not recruiting(1), Not yet recruiting(2)	Multiple cancer types(3), Bone Sarcoma(1), GI(7), Breast(1)	CTRI/2021/05/033482[Phase 3; Not Yet Recruiting]
Lovastatin	ABCB1, HDAC2, HMGCR	N	N	Yes	1	Other	ChiCTR2000036467[Not available/Missing:Pending:GI]	Other(1)	Not yet recruiting(1)	GI(1)
Maprotiline	ABCB1	N	N	Yes	1	Phase 1	NCT04200066[Phase 1:Not yet recruiting:CNS]	Phase 1(1)	Not yet recruiting(1)	CNS(1)
Mefloquine	ABCB1	N	Y	Yes	1	Phase 1	NCT01430351[Phase 1:Active, not recruiting:CNS]	Phase 1(1)	Active, not recruiting(1)	CNS(1)
Miconazole	ABCB1, NR1I2	N	Y	Yes	2	Phase 2	NCT03878524[Phase 1:Recruiting:Multiple cancer types];NCT02366884[Phase 2:Recruiting:Multiple cancer types]	Phase 1(1), Phase 2(1)	Recruiting(2)	Multiple cancer types(2)
Midazolam	GABRB3, ABCB1	N	Y	Yes	2	Phase 2	NCT02365597[Phase 2:Recruiting:Urological];CTRI/2021/11/038016[Phase 2:Not Yet Recruiting:Urological]	Phase 2(2)	Recruiting(1), Not yet recruiting(1)	Urological(2)
Mifepristone	ABCB1, NR1I2, KLK3, NR3C1, PGR	N	N	Yes	2	Phase 3	NCT05016349[Phase 3:Not yet recruiting:Breast];NCT03225547[Phase 2:Active, not recruiting:Breast]	Phase 2(1), Phase 3(1)	Active, not recruiting(1), Not yet recruiting(1)	Breast(2)	NCT05016349[Phase 3; Not yet recruiting]
Miltefosine	ABCB1	N	N	Yes	2	Phase 2	NCT02788981[Phase 2:Active, not recruiting:Breast];NCT02366884[Phase 2:Recruiting:Multiple cancer types]	Phase 2(2)	Recruiting(1), Active, not recruiting(1)	Breast(1), Multiple cancer types(1)
Nelfinavir	ABCB1	N	N	Yes	9	Phase 3	NCT03077451[Phase 2:Active, not recruiting:Soft Tissue Sarcoma];NCT05036226[Phase 1/2:Recruiting:Urological, Multiple cancer types];NCT03256916[Phase 3:Recruiting:Gynaecological];CTRI/2017/08/009265[Phase 3:Open to Recruitment:Gynaecological];NCT02207439[Phase 2:Active, not recruiting:Head and Neck];NCT03829020[Phase 1:Recruiting:Other Haem-onc];ISRCTN50083238[Phase 2:Ongoing:GI];2008-001078-34[P…	Phase 1(2), Phase 1/2(2), Phase 2(3), Phase 3(2)	Recruiting(5), Active, not recruiting(2), Ongoing(2)	Soft Tissue Sarcoma(1), Urological, Multiple cancer types(1), Gynaecological(3), Head and Neck(1), Other Haem-onc(1), GI(1), CNS(1)	NCT03256916[Phase 3; Recruiting], CTRI/2017/08/009265[Phase 3; Open to Recruitment]
Nicardipine	ABCB1	N	N	Yes	1	Other	ChiCTR-IPR-15006066[Other:Pending:CNS]	Other(1)	Not yet recruiting(1)	CNS(1)
Omeprazole	ABCB1, AHR	N	Y	Yes	3	Phase 2	NCT04337580[Phase 2:Recruiting:Urological];NCT02950259[Phase 1:Active, not recruiting:Breast];NCT04930991[Phase 1:Recruiting:GI]	Phase 1(2), Phase 2(1)	Recruiting(2), Active, not recruiting(1)	Urological(1), Breast(1), GI(1)
Pantoprazole	ABCB1	N	N	Yes	2	Phase 2	CTRI/2018/02/011824[Phase 1/2:Not Yet Recruiting:Head and Neck];NCT01748500[Phase 2:Active, not recruiting:Urological]	Phase 1/2(1), Phase 2(1)	Active, not recruiting(1), Not yet recruiting(1)	Head and Neck(1), Urological(1)
Phenytoin	POU5F1, SCN8A, SCN2A, SCN3A, NR1I2, SCN1A, SCN5A	N	Y	Yes	1	Phase 2	NCT03778996[Phase 2:Recruiting:Bone Sarcoma, Soft Tissue Sarcoma]	Phase 2(1)	Recruiting(1)	Bone Sarcoma, Soft Tissue Sarcoma(1)
Pravastatin	ABCB1, HDAC2, HMGCR	N	N	Yes	2	Phase 4	NCT00840177[Phase 2:Active, not recruiting:Leukemia];ChiCTR2000034035[Phase 4:Pending:Breast]	Phase 2(1), Phase 4(1)	Active, not recruiting(1), Not yet recruiting(1)	Leukemia(1), Breast(1)	ChiCTR2000034035[Phase 4; Pending]
Propofol	GABRB3, ABCB1, SCN2A, SCN4A	N	Y	Yes	29	Phase 4	DRKS00028966[Phase 2:Recruiting:GI];NCT01975064[Phase 4:Recruiting:Breast, GI];NCT05331911[Phase 4:Not yet recruiting:GI];NCT05343260[Other:Active, not recruiting:Multiple cancer types];NCT04800393[Other:Recruiting:Breast];NCT04475705[Phase 4:Recruiting:Multiple cancer types];JPRN-UMIN000021231[Not available/Missing:Recruiting:Multiple cancer types];NCT04259398[Other:Recruiting:GI];CTRI/2021/12/0…	Phase 2(1), Phase 3(2), Phase 4(7), Other(19)	Recruiting(17), Active, not recruiting(2), Ongoing(1), Not yet recruiting(9)	GI(6), Breast, GI(1), Multiple cancer types(7), Breast(5), Urological(3), Lung(6), CNS(1)	NCT01975064[Phase 4; Recruiting], NCT05331911[Phase 4; Not yet recruiting], NCT04475705[Phase 4; Recruiting], NCT05141877[Phase 4; Not yet recruiting], NCT03034096[Phase 4; Recruiting], NCT04513808[Phase 3; Recruiting], ChiCTR2000040604[Phase 4; Pending], ACTRN12611000301965[Phase 4; Not yet recruiting], 2009-009114-40[Phase 3; Ongoing]
Propranolol	ABCB1, EGFR, ADRB3	N	N	Yes	19	Phase 3	NCT05451043[Phase 2:Not yet recruiting:GI];DRKS00014054[Phase 2:Other:GI];NCT04848519[Phase 2:Recruiting:Urological];ChiCTR2100047864[Phase 2:Pending:GI];NCT04518124[Phase 2:Recruiting:Soft Tissue Sarcoma];CTRI/2019/11/021924[Phase 3:Not Yet Recruiting:Gynaecological];ACTRN12620000156987[Phase 1:Recruiting:Skin];NCT04682158[Phase 2:Recruiting:GI];NCT03384836[Phase 1/2:Recruiting:Skin];NCT02641314…	Phase 1(3), Phase 1/2(1), Phase 2(13), Phase 2/3(1), Phase 3(1)	Recruiting(10), Active, not recruiting(1), Not yet recruiting(7), Other(1)	GI(8), Urological(2), Soft Tissue Sarcoma(2), Gynaecological(1), Skin(3), Other(1), Multiple cancer types(2)	CTRI/2019/11/021924[Phase 3; Not Yet Recruiting]
Rifampicin	ABCB1, NR1I2	N	Y	Yes	1	Phase 1	NCT02875223[Phase 1:Recruiting:Multiple cancer types, Lymphoma, Leukemia]	Phase 1(1)	Recruiting(1)	Multiple cancer types, Lymphoma, Leukemia(1)
Ritonavir	ABCC1, ABCB1, NR1I2	N	Y	Yes	1	Phase 1	NTR3632[Phase 1:Recruiting:Leukemia, Lymphoma]	Phase 1(1)	Recruiting(1)	Leukemia, Lymphoma(1)
Sertraline	ABCB1, SLC29A4, SLC6A3	N	Y	Yes	1	Phase 1	NCT02891278[Phase 1:Recruiting:Leukemia]	Phase 1(1)	Recruiting(1)	Leukemia(1)
Simvastatin	ABCB1, HDAC2, HMGCR	N	Y	Yes	18	Phase 4	NCT05464810[Phase 1:Not yet recruiting:Breast];NCT03454529[Phase 2:Active, not recruiting:Breast];NTR988[Phase 2:Suspended:Other Haem-onc];NCT01441349[Phase 2:Active, not recruiting:Lung];NCT04457089[Phase 1:Recruiting:Gynaecological];NCT03324425[Phase 2:Recruiting:Breast];ACTRN12617001087347[Phase 2:Recruiting:GI];NCT03889795[Phase 1:Recruiting:Multiple cancer types];NCT04698941[Phase 2:Recruiti…	Phase 1(4), Phase 2(11), Phase 3(1), Phase 4(2)	Recruiting(7), Active, not recruiting(3), Ongoing(3), Not yet recruiting(4), Suspended(1)	Breast(5), Other Haem-onc(1), Lung(3), Gynaecological(1), GI(6), Multiple cancer types(2)	ChiCTR2000034035[Phase 4; Pending], 2010-018491-24[Phase 4; Ongoing], NCT03971019[Phase 3; Recruiting]
Sirolimus	ABCB1, MTOR	N	Y	Yes	28	Phase 4	NCT04348292[Phase 1:Active, not recruiting:Lung];NCT03217669[Phase 1:Active, not recruiting:Multiple cancer types, Lung];NCT03878524[Phase 1:Recruiting:Multiple cancer types];NTR5584[Phase 1:Recruiting:Multiple cancer types];NCT01737502[Phase 1/2:Recruiting:Lung];NCT05324384[Phase 2:Recruiting:Other];NCT03433183[Phase 2:Active, not recruiting:Soft Tissue Sarcoma];NCT05036226[Phase 1/2:Recruiting:…	Phase 1(7), Phase 1/2(4), Phase 2(13), Phase 3(2), Phase 4(1), Other(1)	Recruiting(17), Active, not recruiting(7), Ongoing(3), Not yet recruiting(1)	Lung(2), Multiple cancer types, Lung(1), Multiple cancer types(6), Other(2), Soft Tissue Sarcoma(3), Urological, Multiple cancer types(1), Bone Sarcoma, Soft Tissue Sarcoma(1), Gynaecological(1), Leukemia(3), Endocrine(1), GI(3), CNS(1), Bone Sarcoma(2), Breast(1)	NCT04775173[Phase 3; Recruiting], ChiCTR1900021896[Phase 4; Recruiting], NCT04736589[Phase 3; Not yet recruiting]
Valganciclovir	ABCB1	N	Y	Yes	5	Phase 2	NCT05431244[Other:Not yet recruiting:GI];NCT05011058[Phase 2:Recruiting:Lymphoma];NCT05166577[Phase 1/2:Recruiting:Head and Neck];NCT04116411[Phase 2:Recruiting:CNS];NCT03397706[Phase 1/2:Recruiting:Multiple cancer types]	Phase 1/2(2), Phase 2(2), Other(1)	Recruiting(4), Not yet recruiting(1)	GI(1), Lymphoma(1), Head and Neck(1), CNS(1), Multiple cancer types(1)
Verapamil	ABCC1, ABCB1	N	N	Yes	1	Phase 1	NCT03013933[Phase 1:Active, not recruiting:Lymphoma]	Phase 1(1)	Active, not recruiting(1)	Lymphoma(1)
Warfarin	ABCB1, AXL, NR1I2	N	N	Yes	1	Phase 1	NCT03536208[Phase 1:Recruiting:GI]	Phase 1(1)	Recruiting(1)	GI(1)
Zidovudine	ABCC1, ABCB1, TERT	N	Y	Yes	1	Phase 2	IRCT20210703051770N1[Phase 2:Recruiting:Leukemia]	Phase 2(1)	Recruiting(1)	Leukemia(1)
